# Supplementary material for: Long-term high physical activity modulates event-related potential indices of inhibitory control in postmenopausal women
Source: PeerJ. 2019 Mar 18;7:e6523. doi: 10.7717/peerj.6523 (PMC6428037; doi:10.7717/peerj.6523)
Supplement: Supplemental Information 1 [file peerj-07-6523-s001.xlsx]

## Sheet: group-1
Go_N2
File	Fz		F3		FC1		Cz		C3		CP1		Pz		P3		F4		FC2		C4		CPz		CP2		P4		FCz
	latency	amplitude	latency	amplitude	latency	amplitude	latency	amplitude	latency	amplitude	latency	amplitude	latency	amplitude	latency	amplitude	latency	amplitude	latency	amplitude	latency	amplitude	latency	amplitude	latency	amplitude	latency	amplitude	latency	amplitude
	163	-7.08217	267	-2.58264	156	-6.477	191	-1.26082	163	-0.837733	168	-2.1952	189	-1.97951	171	-4.05007	191	-0.575052	160	-3.57126	161	0.207505	191	-1.72944	190	-0.083596	159	-0.745747	246	-0.611015
	246	-4.52036	249	-1.66975	241	-3.01587	197	-1.8985	188	-2.10137	190	-3.42745	189	-3.82134	189	-4.49526	284	-1.71356	175	-0.642125	179	-1.88898	190	-3.633	189	-3.53875	157	-4.5706	240	-3.31353
	154	1.6175	152	1.21215	157	1.78977	158	1.35271	150	-3.8619	171	-1.65108	194	-5.44469	150	-7.32503	156	0.138711	153	1.94307	158	1.22922	160	-1.72949	163	-0.531851	150	-14.9764	156	2.7562
	150	-1.03281	150	0.032734	266	-2.04558	266	-1.87307	267	-1.2148	215	-0.519666	269	1.73859	158	-1.58944	164	-4.27124	266	-1.15691	183	-0.618733	266	-0.200152	237	0.220623	169	-0.165173	265	-1.46945
	185	0.337739	177	-2.64213	181	-0.738039	183	-0.452547	184	-2.20901	182	-4.05402	189	-6.47342	189	-4.82363	175	1.91402	176	1.44304	176	-0.40827	184	-3.59637	178	-7.14847	176	-10.1515	180	0.339735
	181	0.968931	261	-2.91141	179	2.27923	207	1.8264	261	0.974856	207	1.55685	208	1.60472	155	2.35654	186	-0.193055	220	-0.492567	208	1.17103	206	1.63706	204	2.39237	150	0.661981	206	0.671006
	201	-0.361196	200	-1.10272	196	-1.04694	205	-0.954482	191	0.213228	150	-1.13443	159	-2.23999	162	-1.47904	158	-1.26981	223	-0.21352	151	-1.14165	206	-3.14389	150	-1.8438	153	-6.71588	204	-0.648758
	150	-2.34697	197	-0.99748	198	-0.618406	205	-1.2443	150	-2.86261	150	-2.80967	150	-3.47925	150	-4.49217	258	0.006317	257	-0.077633	241	-0.423001	165	-0.147091	159	-0.077536	163	0.031884	241	-0.807091
	150	-8.86595	150	-7.29666	150	-6.45196	150	-7.97004	155	-1.24985	152	-5.88275	252	-9.79305	252	-11.1047	150	-8.48182	150	-7.96958	150	-8.102	151	-6.6892	151	-6.94432	151	-9.60773	150	-7.55394
	245	0.491735	211	1.18072	235	1.70018	244	0.111478	237	0.881966	211	2.04613	212	2.00294	175	0.61189	232	1.95734	244	0.335131	244	0.228403	233	1.26647	211	1.39497	194	1.883	234	0.002606
	236	-3.51075	299	-0.628241	151	0.309827	183	-4.45817	293	1.02574	198	-0.120607	150	-1.89371	150	-3.6837	173	0.747633	184	-1.66399	182	2.49186	196	-3.30565	182	-0.737004	151	-2.98121	225	-2.63659
	198	-3.30633	199	-3.06549	199	-3.37735	197	-3.53782	199	-3.7813	200	-3.60678	202	-1.30658	202	-3.05637	195	-1.04888	196	-2.22535	198	-1.63806	199	-2.21366	199	-1.58197	150	1.96035	197	-3.32455
	199	-5.1664	160	-2.40472	259	-3.71395	255	-7.46023	194	-4.70729	193	-5.53399	200	-3.09511	194	-4.22162	185	-1.9166	192	-6.40899	183	-5.42072	206	-5.24171	192	-5.95393	184	-3.94703	244	-7.35015
	295	0.100148	158	1.06009	248	-0.332047	213	0.02434	248	1.86804	213	2.5271	213	2.59461	159	1.44354	248	0.49121	248	0.251103	188	0.498093	213	0.975392	212	2.2544	150	2.04588	211	-0.095698
	228	-1.98731	251	-0.729535	240	-2.1288	226	-1.94754	249	-0.995158	150	-6.00653	197	-2.15853	150	-6.08618	212	-0.362446	226	-1.17061	228	-0.81757	216	-0.812614	172	-2.78959	162	-5.64752	227	-1.84172
	223	-2.48346	229	-1.303	229	-3.18581	226	-3.13179	232	-2.14179	228	-1.65216	209	-0.934357	174	-2.99734	219	0.529574	221	-1.28866	178	-0.233875	225	-3.18229	196	-0.591803	176	-2.0502	225	-3.18074
	150	0.615294	150	0.983801	276	-0.653807	284	-6.27722	173	-1.59067	216	-0.859751	209	1.77819	171	-2.12245	150	2.35773	175	0.759042	248	1.14013	208	1.12954	176	0.180303	150	0.738271	298	-1.0899
	299	-1.12531	299	-0.932204	295	-2.40212	294	-4.26462	299	-2.63594	299	-3.71011	266	-2.98485	263	-2.12451	237	-0.177785	257	-0.854721	268	-1.3729	289	-4.8516	274	-2.81692	179	-1.43207	293	-1.87215
	234	-2.34131	226	-2.07981	229	-2.86956	272	-1.50166	226	-1.19599	181	-0.894007	154	-0.955344	182	-6.56049	150	0.260635	236	-0.178154	191	-0.973366	225	-0.027748	219	-0.514245	177	-7.03183	224	-1.77535
	175	-0.930248	174	2.3329	150	-0.070818	268	-7.58318	257	-1.24651	261	-4.99826	273	-5.28334	174	-3.01205	178	3.90646	150	1.25294	164	-0.47762	263	-6.53442	261	-3.37575	190	-4.24345	268	-2.05831
	239	0.080704	150	0.240725	235	-0.435868	238	0.153637	227	-0.74874	213	0.2551	198	-1.16591	199	-0.691351	239	0.033562	239	0.540713	237	0.716431	213	-0.821073	212	-0.459557	169	-2.75177	239	0.230154
	150	0.439987	150	-0.555972	150	-0.746691	241	-1.23397	153	-2.30256	163	-3.48556	164	-7.91184	164	-11.6565	150	1.49669	240	-0.844808	239	-1.42429	167	-1.45961	171	-2.89884	170	-10.8227	241	-0.611476
	223	-1.96336	286	-0.416774	156	-0.814043	152	-2.8477	249	1.78847	150	0.35157	184	-1.11686	150	-1.01796	161	1.64761	154	-0.638276	210	2.02317	197	-0.909402	199	-0.679661	163	-4.6554	157	-3.22876
	178	-3.44686	150	-3.05889	176	-1.72392	184	-2.97243	150	-4.23818	186	-2.45525	150	-4.38126	151	-11.3679	170	-3.31876	177	-3.32992	179	-2.77862	176	-3.8064	169	-4.67047	150	-9.57719	182	-2.57739
	150	-2.29796	150	-5.10886	166	-4.30927	166	-1.37726	240	-6.9469	240	-10.3625	240	-2.93697	163	-6.41589	167	-1.59311	179	-2.80578	196	-5.3716	244	-1.44649	233	-3.99392	178	-6.23861	187	-1.94691
	280	0.532115	153	2.3817	229	2.01329	224	-2.05466	229	1.21034	208	0.882077	204	-2.30403	156	-0.22922	230	1.24627	230	-0.013855	218	-2.24097	218	-1.62818	210	-1.42702	197	-1.49499	230	-0.477975
	259	-0.0941	260	0.209815	165	-0.535203	150	2.02923	262	1.71134	151	0.702618	178	-0.149012	175	-7.8342	246	-0.315759	150	0.812625	150	1.26721	179	0.019479	206	2.30809	181	-3.32024	160	0.245464
	234	-1.36375	156	-3.1981	209	-0.473403	213	-0.567207	210	-0.657582	212	-1.06648	212	-2.12063	213	-1.39638	203	-1.18359	212	0.214163	206	0.88203	212	-1.06725	212	-0.106291	205	-1.6723	212	-0.790409
	290	-1.3078	189	-4.50083	233	-1.59115	264	-0.24888	212	-5.0195	187	-3.9017	177	-5.69386	153	-8.7165	157	-1.33553	274	2.53507	192	2.96115	190	-2.83806	188	-1.01706	162	-5.81369	253	1.34935
	293	-3.93571	255	-1.97275	235	-2.81946	214	-1.68371	220	-0.675967	165	-0.851056	202	-3.03851	191	-3.64227	224	-3.00142	218	-1.42725	210	-3.15979	207	-1.89203	207	-1.87387	164	-8.12969	252	-2.46355
Go_P3
File	Fz		F3		FC1		Cz		C3		CP1		Pz		P3		F4		FC2		C4		CPz		CP2		P4		FCz
	latency	amplitude	latency	amplitude	latency	amplitude	latency	amplitude	latency	amplitude	latency	amplitude	latency	amplitude	latency	amplitude	latency	amplitude	latency	amplitude	latency	amplitude	latency	amplitude	latency	amplitude	latency	amplitude	latency	amplitude
	323	9.30353	424	-2.01748	310	2.28875	376	1.07499	315	4.13588	318	4.65494	445	3.55536	415	5.8012	446	6.77646	323	6.04294	321	6.88554	499	2.2783	416	4.05935	321	4.01716	355	1.1228
	499	-0.735305	491	0.339996	490	1.60434	389	3.00684	452	2.30528	406	6.50381	395	8.45538	395	8.55724	499	-0.794477	337	1.63241	343	3.84593	395	8.41384	395	8.80913	392	9.58423	379	1.64993
	363	3.48942	335	3.45986	360	3.98084	365	4.69268	472	3.59938	478	3.5783	479	0.141035	475	2.51179	365	8.92597	364	7.3298	300	3.2403	478	4.06423	333	4.15549	475	4.52897	362	5.05239
	397	4.38706	397	2.6939	394	5.69734	380	6.64814	398	4.54973	406	8.11864	376	10.4098	409	5.27267	464	5.14669	381	4.61873	381	6.48093	377	9.64386	379	9.28745	391	8.38996	395	4.05487
	477	4.87594	481	3.96212	483	6.66596	483	8.86032	483	8.3047	481	9.42044	480	7.02888	434	2.50794	343	5.77067	481	7.63702	329	6.10218	482	9.15146	481	3.60975	480	2.00744	481	7.25509
	329	7.64096	489	-1.73656	343	9.37653	346	10.9503	331	2.86343	348	6.81776	356	10.7126	392	8.49019	327	6.43576	330	8.22835	328	12.5842	343	8.83306	342	15.1315	306	9.52199	345	9.24383
	434	1.84121	499	2.90385	499	2.38744	439	3.20906	478	2.97175	300	4.38809	405	3.25058	433	3.51062	440	1.28457	440	2.75342	405	2.71606	436	5.12408	410	2.84135	300	2.22589	435	1.77365
	499	-0.207176	368	0.923011	356	0.166277	373	1.10528	465	0.301882	465	0.313846	466	0.187607	466	0.44597	380	0.632804	369	0.736798	382	0.41475	331	0.491329	304	0.395612	306	0.475294	378	2.25712
	300	14.4373	300	14.0644	338	13.9813	338	15.0656	427	8.35604	300	13.0986	376	14.9803	376	15.0675	300	14.9057	300	16.0925	300	16.9631	338	17.7921	337	19.0099	337	17.4747	338	14.9074
	397	3.77195	399	3.64047	325	5.63009	437	2.70235	401	2.99718	400	5.1937	416	6.85808	415	4.57849	374	5.63636	425	4.27504	426	6.30217	421	6.27207	425	7.26223	374	7.37023	325	3.99152
	374	0.737373	475	0.667425	340	2.76916	373	1.29488	420	2.92197	393	3.53888	347	8.30599	422	5.12132	322	6.00808	336	3.65762	363	8.35261	394	8.83154	347	9.79546	344	8.25394	336	2.99204
	452	6.66862	476	7.03467	473	7.75103	475	9.51221	499	7.65176	476	9.53207	444	12.1739	475	9.31204	342	5.88164	452	9.08871	454	8.42374	475	10.1618	477	9.19065	386	7.06944	452	7.82079
	359	5.67718	347	4.09462	332	1.02976	499	0.06749	350	4.44419	352	3.6496	359	5.25527	357	7.03924	339	6.14094	358	3.59578	360	3.04473	359	6.14019	360	4.03283	361	6.73874	356	1.87517
	413	3.83679	334	4.22426	488	6.41184	487	8.12453	489	3.76759	374	4.75186	385	6.77646	384	4.35718	314	3.06811	432	3.35482	335	3.50347	364	7.13784	362	9.02922	361	6.43935	412	3.43384
	391	2.29134	484	1.1692	390	2.77052	392	3.75173	499	0.614327	300	-1.0256	321	1.50749	300	-1.07649	326	0.204812	385	4.0573	325	2.37015	366	2.74172	365	4.6375	319	2.1516	392	4.18154
	453	3.92512	496	2.87342	495	4.54643	454	4.67249	495	6.43528	452	10.3253	449	10.227	442	3.54709	324	4.54919	379	3.64974	380	2.2687	454	5.01407	380	3.37093	379	1.35334	454	4.31896
	499	4.80686	312	4.72652	394	1.15553	400	-2.05442	499	1.80116	413	1.67823	489	5.55773	453	3.71413	495	6.54853	414	3.46042	498	4.0171	499	4.77709	499	3.80096	300	2.22509	398	0.821938
	451	0.11698	499	-0.255132	499	0.075409	499	-1.03719	499	-0.065981	499	0.846711	489	3.64149	491	4.06314	340	2.42631	383	2.90157	410	-0.255297	499	-0.229199	486	-0.355569	407	4.81236	481	0.830148
	347	2.54691	327	5.75965	313	0.682034	313	-0.68618	310	2.59291	453	4.09624	302	6.274	375	9.18293	300	2.40653	377	3.60952	475	2.26295	315	3.79662	328	4.79631	350	6.16697	345	2.38925
	421	2.53545	393	6.89895	356	1.6804	474	-2.75482	330	-0.330919	499	0.689483	499	2.11045	499	0.189019	305	8.39976	388	3.65966	320	4.12298	499	0.853446	499	3.31748	495	2.02925	392	0.83515
	414	4.48843	493	2.13188	383	3.34073	384	5.80049	493	4.48053	385	4.44009	373	3.56313	386	3.71512	492	2.77359	466	4.90794	492	5.76967	385	6.20266	385	6.40524	351	2.27799	384	5.08145
	348	8.51152	347	8.65175	347	7.14306	348	7.14242	333	4.81918	348	5.30791	348	0.631515	300	-1.223	349	9.12542	349	7.14538	349	5.05675	348	5.97206	349	5.54096	368	-2.08712	348	7.01327
	403	0.374733	499	1.62902	300	0.228796	300	-1.01149	395	6.9541	355	5.40378	317	3.78192	333	8.51484	366	4.50428	369	2.68352	371	6.43917	322	3.4766	373	9.27741	303	3.30533	300	0.013061
	366	8.33008	375	4.75745	351	6.95588	369	8.85539	370	3.61777	374	12.5212	374	9.70545	349	4.47756	412	5.69085	367	8.09861	413	8.80262	375	9.56382	369	8.381	369	5.65303	365	9.45518
	460	3.70816	311	5.90369	340	4.04576	460	2.25058	481	3.3293	460	5.24	448	6.87258	386	12.3689	378	4.59425	385	7.19996	357	5.72814	458	4.78474	447	5.47173	385	9.29225	387	4.39311
	300	0.950136	301	4.56396	368	4.98664	400	5.7144	370	4.82889	403	9.70668	432	18.825	420	12.3442	369	3.09363	400	6.82527	373	10.2482	401	12.5626	432	16.3609	382	17.1256	369	3.57642
	366	0.697944	337	2.81689	300	0.649537	322	3.43644	302	2.91079	321	3.9312	332	4.99267	316	2.06071	351	2.72121	319	2.59294	320	4.63612	331	4.88604	325	7.74782	322	6.91172	499	1.40682
	499	0.630692	300	-1.20821	372	1.03554	373	2.45541	369	1.33422	427	3.24014	374	3.45672	421	3.37204	472	4.03565	381	2.8801	300	3.96008	378	4.17261	380	4.16816	374	3.61707	373	2.79906
	300	-1.31901	436	5.7097	499	0.082599	482	2.22588	472	4.02725	436	4.07231	409	3.60961	433	6.70816	300	1.10885	323	3.32627	324	8.66078	421	3.01768	306	3.66007	330	5.91661	305	1.59551
	313	-2.51458	469	1.16212	481	4.77773	488	8.16858	481	5.16224	482	6.46114	386	12.641	437	8.54456	499	1.07788	498	5.39795	362	8.09823	388	9.93624	388	10.0456	339	11.5809	498	2.96523
NoGo_N2
File	Fz		F3		FC1		Cz		C3		CP1		Pz		P3		F4		FC2		C4		CPz		CP2		P4		FCz
	latency	amplitude	latency	amplitude	latency	amplitude	latency	amplitude	latency	amplitude	latency	amplitude	latency	amplitude	latency	amplitude	latency	amplitude	latency	amplitude	latency	amplitude	latency	amplitude	latency	amplitude	latency	amplitude	latency	amplitude
	163	-8.26075	284	-3.0483	156	-6.60722	219	-1.81693	166	-0.90269	169	-2.06298	193	-2.02685	171	-3.63749	218	0.107332	157	-4.01491	165	0.335686	219	-1.30562	194	0.019358	158	-1.45536	242	-1.05983
	248	-3.55383	250	-1.96795	238	-2.45748	191	-2.50635	189	-3.45287	192	-5.11207	192	-5.16279	191	-5.91461	235	-0.8104	175	-0.42948	171	-1.21787	192	-4.87798	192	-4.75559	191	-6.61672	237	-2.91326
	299	0.610735	152	1.2423	299	2.0756	181	1.40045	154	-2.56936	181	-1.52654	196	-5.71258	154	-7.3713	163	0.979096	164	2.48947	165	0.611059	173	-1.69035	166	-1.17685	154	-14.7334	299	1.46415
	240	-0.051745	188	-0.326343	240	-0.791756	240	-0.715774	239	-0.296848	238	0.550945	150	1.10307	150	-1.91352	172	-3.44686	266	-0.094528	187	-0.354672	238	1.23084	219	0.927318	185	-0.680983	240	-0.865484
	150	1.26964	175	-2.65902	178	1.62154	150	0.840852	180	-1.70127	180	-2.59771	193	-6.55968	193	-5.27874	164	0.466103	165	1.38687	168	-2.20198	179	-3.83773	178	-7.71342	171	-11.4835	150	1.06825
	181	1.02304	239	-0.19116	180	0.134319	202	1.82119	182	0.584164	192	0.542301	201	1.24239	181	-1.25053	214	0.723461	204	-0.164113	204	1.88443	202	1.47785	202	2.48666	150	1.17029	202	0.698407
	200	-0.209507	216	-1.11593	217	-1.04802	201	-0.895071	215	0.610219	160	-0.739672	161	-1.9272	167	-1.04541	184	-1.95347	185	-0.662409	157	-1.40397	201	-3.34232	150	-2.05934	155	-6.53102	203	-0.803758
	150	-3.19398	180	-1.59887	181	-0.825088	199	-1.12338	150	-4.24248	150	-4.25411	150	-4.92459	150	-6.17926	169	0.122861	173	0.041366	243	-0.117497	159	-0.3815	167	-0.092679	197	-0.125947	192	-0.079972
	153	-7.652	152	-5.52517	153	-6.29983	153	-6.71397	158	-3.22897	154	-6.96261	182	-8.71299	183	-9.59984	152	-6.64349	153	-6.02935	153	-5.85452	153	-4.8759	153	-4.76818	154	-6.89575	153	-5.95928
	217	0.021147	204	-1.66485	217	-0.011646	218	-0.834925	217	-0.187544	216	0.241533	208	-0.425548	166	-1.39279	234	1.14	218	-0.566159	217	-0.746374	217	-0.839026	208	-0.575757	208	-0.888313	218	-0.402551
	219	-3.46869	299	-0.061451	183	-0.159136	186	-4.74187	216	1.00228	200	-0.830011	185	-2.69079	150	-3.78399	174	0.994309	218	-1.39241	185	3.38693	199	-2.12213	185	-0.309546	150	-3.64098	218	-2.40624
	201	-3.2793	201	-3.27625	202	-3.26708	202	-3.76353	201	-3.70316	201	-3.87667	203	-1.28543	201	-3.18062	179	-1.66732	186	-2.06701	202	-0.65565	201	-2.64139	200	-1.60374	150	2.14941	201	-3.29868
	183	-6.51808	172	-2.71374	258	-2.81673	259	-7.08218	188	-5.92092	187	-6.34391	191	-3.42787	189	-5.39756	196	-2.74789	183	-8.58197	181	-5.30126	212	-5.51441	187	-6.65742	177	-4.52356	212	-7.3573
	299	-1.4041	156	0.838947	208	-1.31807	210	-1.33154	266	0.411265	201	1.84889	220	2.32845	154	0.311151	154	2.21412	155	0.96376	154	1.08178	210	-0.125652	206	3.41498	155	0.885794	299	-1.83936
	246	-2.8847	234	-0.404233	236	-2.28536	233	-2.09219	245	-0.434787	150	-6.40441	192	-1.93707	150	-6.45618	270	-0.342824	235	-1.09693	237	0.125231	228	-0.6732	166	-3.00784	156	-6.24669	237	-2.1429
	225	-3.34677	223	-1.3833	225	-3.53076	226	-3.77169	241	-3.09474	224	-2.48268	215	-0.88649	168	-2.89203	283	-0.876884	209	-1.62889	186	-0.694211	226	-3.80764	187	-1.44393	175	-2.57049	226	-3.74727
	155	0.398575	150	0.76636	264	-1.4564	299	-6.17684	210	-1.93644	212	-1.33315	206	1.33334	158	-2.54375	151	1.21421	222	-0.220886	228	0.482375	205	0.588966	157	0.031422	150	0.499881	299	-1.24915
	299	-1.48851	299	-1.69553	299	-3.1788	286	-4.24169	289	-2.6195	273	-3.80856	262	-3.19204	273	-3.00904	204	-0.226582	287	-1.08653	250	-0.89709	273	-4.75843	260	-2.38725	178	-0.879424	299	-2.33887
	231	-3.17024	224	-1.35408	230	-3.40151	277	-1.59631	201	-1.8052	201	-0.857878	176	-1.16015	194	-5.69719	167	0.436967	267	-1.07233	199	-1.12868	227	1.05443	202	-1.28797	196	-6.88855	219	-2.38652
	168	-1.92409	152	-0.490314	150	0.224862	266	-8.26004	299	-0.620738	261	-5.24712	299	-7.41826	197	-4.01332	150	2.03213	150	0.42739	196	-0.99475	265	-7.13145	261	-4.70403	198	-6.66354	266	-1.88794
	211	0.690332	208	0.090328	232	0.12803	212	0.45225	208	-0.648756	206	0.284482	202	-1.65112	158	-1.00499	222	0.113383	211	0.540954	199	0.178499	203	-1.23108	202	-1.1108	160	-3.67003	212	0.604222
	150	1.32233	150	0.269711	152	-0.530449	163	-1.25945	156	-2.78285	164	-5.41791	166	-10.4813	168	-13.9817	150	1.51892	239	-0.215084	169	-2.9217	167	-3.92881	168	-6.51658	168	-15.7851	239	-0.064371
	223	-1.45983	246	1.11736	165	-1.3499	151	-2.72295	263	2.16982	150	-2.91039	171	-4.93515	150	-6.73778	152	0.747693	155	-1.00437	201	2.96909	168	-3.03067	200	-2.7547	168	-9.24265	158	-4.23936
	174	-4.98967	170	-4.22255	174	-4.10345	183	-5.72801	151	-4.77412	182	-4.08164	167	-7.32002	150	-12.3356	183	-5.23678	182	-4.94085	182	-2.67002	182	-6.23649	167	-7.50951	150	-11.5877	183	-4.94703
	153	-2.99335	158	-5.55398	171	-4.82708	171	-2.59155	202	-5.08519	230	-8.43676	205	-3.73835	168	-8.39662	171	-3.10963	171	-3.55966	202	-7.06569	246	-1.9046	204	-5.31897	171	-9.27485	181	-2.80923
	299	1.2947	160	3.48236	193	2.17121	233	-1.19146	234	1.63599	202	1.42045	198	-2.52662	197	-0.876015	235	1.61339	202	0.2622	201	-2.52774	197	-1.84824	196	-2.99699	195	-3.6326	234	-0.110117
	264	-0.160836	263	0.557234	179	-0.900598	150	2.52087	150	1.50233	175	0.723234	175	-0.796014	175	-7.98012	233	-0.007513	160	1.40918	161	1.55704	175	-0.558694	175	2.52488	175	-4.57519	171	0.614334
	271	-2.6074	150	-3.14169	241	-1.07963	206	0.371937	209	-0.374021	211	-0.467739	215	-1.03462	205	-1.15714	209	-2.00437	210	-0.158403	189	0.952819	211	-0.625485	189	0.60262	189	-1.82108	207	-0.193538
	256	-0.053619	200	-4.39537	231	-1.14029	258	-0.095876	203	-5.05939	201	-3.61159	163	-5.58659	158	-9.34465	299	-2.42658	256	1.83072	256	2.86585	213	-2.53907	198	-0.186406	156	-6.74893	235	1.32653
	281	-3.7907	252	-2.77874	241	-4.74402	239	-3.38138	251	-2.52196	164	-2.03078	194	-2.26171	165	-5.4716	244	-3.02397	240	-2.72901	167	-2.60057	164	-2.26888	165	-2.30531	169	-9.00157	240	-3.89362
NoGo_P3
File	Fz		F3		FC1		Cz		C3		CP1		Pz		P3		F4		FC2		C4		CPz		CP2		P4		FCz
	latency	amplitude	latency	amplitude	latency	amplitude	latency	amplitude	latency	amplitude	latency	amplitude	latency	amplitude	latency	amplitude	latency	amplitude	latency	amplitude	latency	amplitude	latency	amplitude	latency	amplitude	latency	amplitude	latency	amplitude
	318	7.38194	479	-2.16065	317	0.9354	396	2.42318	308	4.54442	308	5.31973	340	4.07538	309	4.48205	399	8.54366	316	5.2446	308	6.40906	342	3.04645	341	4.48287	381	3.72439	399	2.53063
	458	4.61748	457	1.05382	457	5.14332	409	3.86489	395	1.17474	342	5.27717	345	8.09106	344	7.85135	300	-0.243774	369	2.09428	346	3.1502	346	8.16549	347	8.25129	345	9.56621	421	8.89782
	488	4.29485	499	3.77161	499	5.67435	493	6.11785	305	3.1717	338	1.62112	300	-3.27892	307	0.705634	486	7.83106	486	7.42103	300	1.93489	499	1.19244	328	1.87702	300	2.30032	489	6.72443
	422	5.06875	427	4.5045	462	7.14323	499	7.08995	460	6.77703	461	9.69272	415	9.85826	462	5.9214	484	3.69678	486	5.11694	352	6.30229	499	10.7398	475	9.05392	415	7.774	460	5.36518
	495	12.7386	495	5.69009	495	14.381	496	14.1809	496	9.90854	496	11.9044	496	4.89153	380	0.361416	495	8.52159	496	15.044	496	10.1738	496	9.50588	496	3.55192	496	0.176618	495	14.2221
	430	10.3099	499	7.23956	392	14.8737	392	13.3624	465	8.8654	359	10.599	386	13.9188	355	13.2083	499	7.04623	391	7.97529	437	13.1353	352	10.8262	390	17.0587	336	9.93511	423	11.7235
	355	1.65846	499	3.79842	412	2.70757	499	3.15628	356	4.18534	308	5.64841	401	3.07335	409	4.14204	438	0.760888	439	2.364	476	1.87822	439	4.86439	499	2.38778	307	3.1873	499	1.85854
	337	-0.745878	461	1.50929	460	0.590216	459	2.16657	333	-0.487604	335	-0.481466	334	-0.9266	332	-0.987347	389	0.689052	392	0.727828	424	0.80492	340	0.305143	341	0.317692	353	0.190471	405	2.85255
	317	14.4764	316	15.469	317	14.9667	317	15.8994	318	9.38721	317	13.1253	479	27.0523	479	28.3186	315	15.9044	317	17.0931	317	18.9183	319	18.1354	319	19.0796	319	16.1992	319	15.5324
	368	5.96106	352	5.88218	456	7.43727	307	2.86559	356	5.75908	370	8.17748	372	9.47482	363	6.89514	372	7.55335	482	4.43113	379	5.25867	372	7.10451	376	7.94079	372	8.51631	456	5.94654
	425	2.29616	300	-0.102799	335	2.31808	489	1.29717	480	1.26631	494	3.15073	494	5.58852	304	1.29815	426	7.19842	408	6.28922	496	6.96873	497	7.75173	494	7.02345	309	5.72198	408	5.51387
	481	7.9151	499	9.1835	481	10.496	493	10.9149	499	10.4906	499	11.7907	451	13.8582	499	11.3413	499	7.02013	491	11.3916	494	12.8195	499	12.7153	499	12.9607	305	7.68874	482	9.28847
	404	6.42021	323	6.65616	447	4.03478	499	4.54121	323	6.24641	473	5.5659	475	5.37514	332	7.43839	472	7.2861	467	5.50142	473	5.72116	499	9.58967	474	6.70444	353	6.30374	473	5.72854
	455	3.40944	388	5.67961	399	4.32322	378	6.58327	391	2.69159	391	6.07291	390	7.54674	388	3.87973	332	3.92921	376	3.51865	376	5.04113	382	7.14737	377	10.2819	375	6.69665	499	1.97903
	462	2.71624	443	2.19784	445	4.03433	499	3.86473	499	1.25573	300	-0.481179	330	2.00594	300	-0.465303	323	-0.034922	423	4.24374	393	3.61425	393	2.8124	499	3.65575	326	2.22376	442	5.00498
	455	5.54474	456	2.70746	455	7.05702	456	7.2687	457	5.34534	458	8.00952	499	8.96941	499	2.72924	347	2.37016	432	4.3233	394	1.8774	456	7.2194	393	2.79634	392	0.366496	455	7.20096
	308	4.38895	309	4.52691	487	2.33004	391	-0.822666	386	0.823101	385	1.8282	355	6.52665	405	4.61391	305	5.4504	396	1.13236	487	1.80096	351	5.08007	300	1.44113	308	1.81143	459	1.29828
	476	0.329539	499	-0.126098	499	-0.39483	499	-3.70516	499	-1.20593	301	-2.53472	387	1.10703	382	0.866159	422	1.45211	425	1.66362	349	0.738564	304	-3.43519	359	-0.105512	362	7.02705	499	-0.166932
	499	6.97069	469	8.81299	499	4.91093	499	1.72801	438	4.5649	396	5.81827	328	6.92195	437	8.08363	321	3.11494	464	4.32559	337	2.86749	326	4.92065	331	6.15703	444	4.005	465	4.2388
	300	1.42884	310	6.71336	428	3.86472	491	3.68118	458	4.40205	458	5.20879	457	1.58207	460	-0.032823	308	9.61556	407	5.53592	430	4.04151	458	3.93379	458	5.03055	459	2.06012	499	3.19783
	460	5.76563	352	2.67706	428	6.22516	460	6.65408	353	4.81121	428	5.04866	334	2.96945	339	3.8671	478	2.20952	477	4.51698	478	4.79107	478	6.42982	478	6.34578	321	2.39815	457	5.56971
	453	12.396	453	10.8436	409	8.35077	383	7.51283	383	6.29899	339	6.09214	336	1.39113	300	-2.12991	456	12.0569	454	8.27393	414	4.1253	339	6.10065	338	4.68159	305	-4.56708	421	8.38579
	436	1.51669	346	2.97976	300	0.096011	300	-1.21778	324	8.64737	340	5.29171	350	2.69046	341	5.92403	315	5.82205	407	4.02224	315	9.63251	352	3.26114	361	8.41995	369	-0.277784	441	0.019184
	411	9.46887	416	4.9894	413	8.31893	414	9.21001	499	3.66874	449	12.4838	414	4.49186	358	1.68138	347	4.18542	413	9.32287	478	11.9064	414	8.41131	415	6.27889	329	2.62	412	11.3621
	499	3.42937	468	5.64226	446	6.75306	357	-0.5638	499	4.70818	499	3.01313	453	3.42618	455	10.9225	360	2.05779	452	4.72732	449	2.45918	499	0.871556	499	1.83597	358	4.6884	454	4.18729
	454	4.52993	300	6.25831	348	7.19083	364	6.38315	344	6.87854	339	11.0274	403	15.0108	403	8.40542	344	4.67824	347	6.7651	405	7.6999	404	10.9245	363	12.6405	406	12.983	348	4.95731
	490	1.14447	370	3.60687	322	1.02793	361	4.84127	348	4.59856	348	5.64537	353	5.55184	350	2.47254	352	3.83843	327	3.4107	328	5.85756	355	5.56484	360	9.72743	336	7.95122	497	1.32471
	390	-0.9413	382	-0.014875	461	2.60075	499	4.62553	499	2.65299	499	4.68462	499	5.29611	499	3.59863	353	1.41369	499	3.5671	499	5.947	499	5.38274	499	5.64704	499	4.75224	499	4.27986
	437	1.39274	472	5.12154	439	4.03847	309	1.87953	347	1.371	321	0.424253	497	0.035486	352	5.34844	392	0.045468	400	3.53868	312	5.58825	499	0.486967	387	1.58789	390	4.18436	439	4.42206
	463	-2.21158	490	2.46889	491	6.40819	496	8.17717	462	4.75338	333	5.13961	364	13.2252	331	9.09327	445	0.811257	449	6.40344	445	10.1164	441	10.2261	441	10.3381	360	12.3675	491	5.0412
diff_N2d
File	Fz		F3		FC1		Cz		C3		CP1		Pz		P3		F4		FC2		C4		CPz		CP2		P4		FCz
	latency	amplitude	latency	amplitude	latency	amplitude	latency	amplitude	latency	amplitude	latency	amplitude	latency	amplitude	latency	amplitude	latency	amplitude	latency	amplitude	latency	amplitude	latency	amplitude	latency	amplitude	latency	amplitude	latency	amplitude
	225	-4.48676	188	-1.1706	229	-1.35548	229	-1.52905	230	-2.07286	230	-1.81058	229	-1.52058	220	-1.27445	229	-1.55062	240	-2.60421	242	-2.09815	229	-1.04107	230	-1.61935	230	-2.23055	150	-1.3262
	236	-11.9857	249	-0.46134	229	-6.06801	171	-1.27411	200	-6.2449	199	-6.28872	193	-3.26177	196	-4.96681	242	-3.81401	231	-5.18128	216	-4.58813	193	-3.16592	195	-4.86526	194	-7.497	236	-2.39458
	231	-7.08739	192	1.1526	224	-1.42837	150	0.497277	230	-6.46654	230	-5.53299	150	-6.10905	150	-7.28002	150	-1.90661	238	-1.09866	208	-2.50249	150	-3.03504	150	-2.25609	150	-14.67	173	1.79306
	237	-8.84381	190	-0.886802	229	-4.51542	241	-1.02181	230	-5.77046	239	-4.18012	150	-0.616674	150	-1.92426	150	-5.03449	241	-5.98443	242	-4.61958	150	0.54137	239	-1.56428	187	-1.00334	239	-0.343946
	227	-4.92215	192	-2.26753	212	0.395709	150	-0.788941	199	-3.78857	225	-2.53406	171	-4.84633	240	-5.02738	150	-2.20826	242	-1.2224	242	-3.90299	150	-4.02806	171	-8.55816	177	-11.2968	170	0.253781
	230	-6.60546	222	0.84321	215	-0.859036	238	2.59394	223	-4.4028	240	-2.93787	243	0.248745	243	-0.809214	240	-1.40982	239	-5.07516	215	-2.43897	240	1.67264	232	1.52696	150	1.18916	213	0.61281
	231	-9.25442	201	-1.35089	217	-5.13175	246	-0.663484	223	-4.73737	229	-2.87892	150	-3.4559	239	-1.93946	150	-4.52558	240	-6.23425	241	-6.17604	249	-3.494	150	-4.25658	150	-6.23102	213	-0.851173
	230	-9.47454	190	-1.82004	224	-4.47484	242	-0.69777	229	-6.06862	230	-5.08313	150	-6.64433	150	-6.18999	150	-2.82066	241	-5.73795	241	-5.87206	150	-2.24856	242	-2.80804	239	-3.7578	181	-0.475751
	150	-2.88387	152	-3.99653	152	-0.008364	152	-8.18179	158	-2.49271	152	-6.2738	177	-7.30377	185	-6.81631	151	-9.56874	152	-3.4565	152	-6.82897	153	-6.59562	153	-6.63331	153	-6.51031	153	-6.5727
	236	-8.77542	202	-2.02014	217	-4.09537	248	-0.776272	222	-5.33785	248	-3.44503	249	-0.539525	247	-2.84582	241	-1.25952	240	-5.91472	241	-5.47013	218	-0.161063	216	-1.85177	210	-3.76344	217	-0.401866
	234	-12.497	192	-0.041637	215	-3.76027	170	-4.10766	224	-4.38543	224	-4.20876	150	-4.00518	150	-3.79473	249	-1.09667	239	-6.7355	218	-0.67655	200	-0.664856	150	-1.51351	150	-3.62211	215	-2.47548
	224	-9.48344	200	-3.76042	209	-6.6761	206	-2.7618	208	-7.67655	208	-6.11191	208	-0.220351	208	-3.46715	212	-2.64175	211	-4.9423	209	-4.56841	201	-1.19515	208	-2.38155	238	0.542602	184	-3.44084
	228	-12.6846	190	-2.6513	230	-5.32336	243	-7.29966	208	-9.23289	224	-8.17615	230	-3.23127	210	-4.763	216	-3.25865	230	-11.6251	216	-7.34128	230	-4.72377	184	-6.71924	186	-4.46788	213	-7.48015
	228	-9.22962	191	1.7413	222	-5.25331	217	-0.852179	231	-4.76801	230	-1.71029	249	1.71905	235	-1.86643	150	-0.701546	241	-4.02357	243	-3.17033	219	0.610213	219	1.72491	221	-0.40247	216	-1.03861
	235	-11.7327	192	-0.448252	227	-6.28205	238	-2.20766	230	-5.69819	150	-6.36313	160	-1.95008	150	-6.46691	242	-2.96649	240	-7.05146	240	-5.54342	231	-0.723732	162	-4.0914	150	-5.89043	231	-1.66148
	227	-12.1528	222	-1.11824	225	-7.67901	227	-3.5851	231	-8.23416	229	-6.99346	241	-1.67758	240	-3.08857	150	-2.33425	237	-6.95249	240	-5.56439	228	-3.6471	239	-2.84648	206	-3.6152	226	-3.43732
	230	-6.38579	190	2.33337	224	-5.0872	237	-4.0964	210	-6.32339	244	-5.04049	150	0.02981	211	-2.16557	150	-1.97939	236	-5.62273	230	-4.56382	150	-1.14656	239	-2.11385	240	-2.4985	180	-0.705438
	234	-9.36868	199	-0.531469	228	-4.97267	249	-3.43849	230	-6.13031	249	-7.12633	249	-4.2355	242	-5.44022	243	-3.13493	243	-6.39789	243	-6.30774	249	-4.28926	249	-4.80335	229	-2.09912	249	-0.998729
	231	-12.2841	222	-1.07865	228	-7.47664	232	-1.02252	223	-6.32174	228	-3.8762	150	-1.5703	197	-5.10704	150	-2.44815	239	-6.63795	243	-5.2286	150	0.028585	205	-2.04126	200	-8.44104	216	-2.42591
	231	-7.67234	153	1.01105	229	-2.86923	249	-6.79119	228	-6.07405	242	-9.42079	249	-8.13393	242	-6.30115	150	-1.16579	237	-2.83881	241	-4.75492	249	-6.68964	242	-6.91186	211	-9.05355	150	-1.65907
	232	-8.17817	201	-0.117089	225	-3.99809	236	0.773434	224	-5.54738	241	-3.74553	249	-1.95412	243	-2.84903	242	-2.77729	240	-4.88433	241	-4.7201	242	-0.110792	241	-2.43515	202	-4.14829	213	0.485762
	236	-5.90911	151	1.8987	230	-3.03231	153	-2.57003	237	-5.03712	239	-5.98591	162	-10.643	159	-10.2517	150	-1.67901	240	-6.19005	240	-7.71723	162	-4.74343	168	-7.4	169	-15.3736	152	-0.301969
	231	-10.3189	222	2.48456	228	-3.73165	150	-4.34894	232	-3.00237	238	-3.21868	150	-5.38242	150	-6.74851	150	-2.40908	240	-4.63665	240	-1.80222	150	-4.97251	150	-3.49795	185	-8.91473	162	-5.00286
	229	-10.845	190	-3.10634	222	-6.69773	169	-4.79385	229	-5.10535	222	-5.42849	150	-8.65638	150	-12.3464	150	-6.98479	228	-6.07775	218	-4.97452	166	-6.0744	150	-9.08542	150	-11.5688	182	-5.47432
	230	-8.23149	158	-4.41298	201	-3.7795	150	-3.50224	228	-10.5725	230	-13.0824	247	-5.01644	150	-6.79342	171	-4.23671	239	-5.71603	242	-11.1847	249	-2.53319	244	-6.85802	171	-9.03022	172	-3.53721
	236	-6.74595	159	4.65083	229	-1.16292	234	-1.23641	231	-3.77646	231	-2.54646	200	-1.08459	244	-2.50388	243	-1.20786	240	-5.183	210	-6.28462	198	-0.359442	199	-3.47361	199	-5.05129	216	0.286617
	232	-8.99584	224	1.35589	214	-3.97024	150	0.891074	229	-4.05708	230	-2.50746	150	-0.798223	198	-6.51545	241	-2.89426	240	-2.98034	241	-1.52239	161	-1.02511	229	0.972911	208	-4.51337	171	-0.239927
	237	-10.7493	159	-1.71846	224	-4.83354	242	0.080614	223	-5.71933	239	-4.36079	242	-2.11579	240	-3.4903	211	-3.05984	241	-5.32469	242	-4.00659	241	-0.462403	241	-2.16847	241	-4.88805	183	-0.448992
	234	-8.93999	200	-4.88458	229	-5.1877	246	-0.304045	228	-10.0293	241	-7.73844	154	-6.25676	150	-8.72791	150	-4.69046	241	-3.60328	242	-2.21644	248	-2.51582	150	-1.89816	150	-6.41884	233	1.8076
	238	-9.82015	249	-1.11521	238	-7.59334	240	-3.6532	242	-7.01538	249	-3.06095	161	-0.673795	195	-3.42621	243	-6.09151	240	-8.71635	239	-6.72154	162	-3.21287	163	-3.39625	171	-8.70341	240	-3.36808
diff_P3d
File	Fz		F3		FC1		Cz		C3		CP1		Pz		P3		F4		FC2		C4		CPz		CP2		P4		FCz
	latency	amplitude	latency	amplitude	latency	amplitude	latency	amplitude	latency	amplitude	latency	amplitude	latency	amplitude	latency	amplitude	latency	amplitude	latency	amplitude	latency	amplitude	latency	amplitude	latency	amplitude	latency	amplitude	latency	amplitude
	303	-0.666518	323	0.311422	381	1.12093	398	1.55446	308	0.860035	306	1.24567	306	1.58597	303	1.98513	399	3.3115	367	0.142349	300	1.1749	306	2.19547	305	1.00185	397	0.628779	399	2.40677
	399	-5.88013	323	2.81734	399	6.44138	316	2.93559	394	-0.331939	345	2.21909	346	5.35935	349	5.18194	300	-3.54639	370	-2.35875	355	-2.15269	346	7.42615	344	4.57664	344	6.02894	399	6.54513
	362	-3.94608	345	7.03807	398	5.92506	399	3.08294	394	1.00271	353	-1.24167	300	-3.94484	300	-0.859055	300	1.13299	372	0.942952	300	-2.82451	300	0.696351	300	-0.433575	300	-1.08857	399	4.09631
	357	-3.04571	368	7.47312	367	7.41699	356	4.58819	355	3.65321	356	5.29897	366	5.91007	356	1.45571	300	-4.81634	356	-1.68044	354	1.11319	356	8.14223	355	4.20596	357	3.79787	399	3.34528
	357	-1.7566	389	5.06145	394	9.43615	356	5.41818	357	4.05076	356	3.38667	302	-0.715723	300	-1.94077	303	1.42232	399	2.79785	357	0.763481	305	2.29281	305	-2.99505	399	-5.37069	399	5.26827
	391	2.27993	346	6.1606	394	17.1557	393	12.3833	394	4.98854	355	7.76413	385	11.3097	355	10.8544	399	-0.748494	399	3.12377	399	7.66644	350	9.9852	392	13.0488	357	6.51585	399	10.8374
	359	-4.45201	353	7.70508	399	4.59158	329	2.06595	354	2.79759	354	2.2839	301	1.9145	300	1.91749	300	-4.21329	399	-2.46314	399	-3.36551	399	2.83635	300	-0.436613	300	-0.30661	399	1.48186
	360	-7.25596	357	5.11733	396	2.46648	302	1.07953	353	-2.02661	353	-3.41874	300	-1.96243	300	-2.82276	300	-2.86361	372	-3.81433	399	-4.44631	301	0.440151	300	-2.00511	399	-2.71993	399	2.66572
	315	5.49021	320	18.053	320	13.304	317	15.7328	356	7.20434	316	8.47214	362	15.6539	361	15.8837	315	10.8324	316	11.4623	316	12.2557	318	17.7926	317	15.8	319	12.2013	318	15.1503
	365	-0.269795	352	10.0053	393	8.46967	306	2.83737	354	4.37824	356	5.13799	371	6.98127	361	4.20115	372	1.83159	372	-0.208102	372	-0.037374	371	5.78372	373	4.0165	371	5.28962	307	4.018
	363	-5.20101	348	3.42999	399	3.68663	337	-0.145616	345	-1.79488	345	-0.937916	303	4.05753	300	-0.31197	399	1.77652	399	1.50001	300	1.19278	300	4.999	300	4.63779	300	2.21071	399	5.29529
	362	-0.642175	360	9.6129	399	11.2932	399	7.62094	348	5.07921	399	4.40787	399	10.2898	359	4.6313	301	1.97482	399	4.56352	399	3.35744	329	7.38159	302	6.57645	300	4.2264	399	7.79622
	369	-1.04529	323	9.772	399	5.04292	399	0.181816	353	4.06376	352	1.30265	304	2.70174	354	4.83433	303	1.82278	399	-1.35574	399	-1.03827	329	5.06904	399	0.838228	354	2.94738	399	2.86288
	399	-5.27811	366	9.25361	397	6.64703	379	5.53135	393	1.15593	392	2.80887	391	4.95891	369	0.031665	300	-0.631124	374	-0.977891	372	-0.209195	382	5.66761	376	6.3155	373	3.39429	399	0.935429
	369	-5.64027	347	5.39322	396	5.18593	398	2.568	353	-0.713113	300	-4.03039	301	-0.03845	300	-1.98998	300	-3.50487	399	-0.413224	399	-1.73715	329	1.97638	331	-0.499398	329	-1.44215	399	4.40422
	367	-2.20295	358	6.16019	399	7.94785	399	5.58613	355	2.9959	354	4.98066	308	5.36594	300	0.142595	300	-2.71403	398	-0.761535	366	-3.49123	399	4.89099	300	-0.948044	393	-2.66574	399	6.19962
	300	-2.83475	310	7.19009	396	3.26444	392	-1.82162	392	-1.09169	385	-1.63733	355	3.8862	356	1.14668	301	1.91326	399	-3.55328	300	-3.25037	347	4.28428	300	-0.779857	300	-1.61721	399	0.393348
	363	-7.9366	347	1.38111	397	-0.907477	301	-3.70559	352	-4.72308	354	-5.41663	302	-1.23715	356	-2.24355	300	-3.48304	399	-3.79598	368	-4.38763	302	-3.21796	303	-3.2815	370	3.76227	399	-2.11321
	358	-3.51588	350	9.20436	397	3.883	310	-0.024596	394	3.05253	396	2.58681	300	5.50052	300	3.89583	300	-0.566407	399	-2.4578	336	-2.55785	319	4.50731	331	2.94877	332	0.208331	399	1.16731
	300	-5.42044	310	9.381	395	5.1807	399	-0.941038	392	0.255287	399	-1.16607	399	-4.09839	356	-3.4552	301	5.99537	399	0.802891	399	-1.15496	399	-0.966762	399	-1.37415	399	-1.95027	399	1.4367
	399	-4.03896	351	6.80453	399	6.58442	399	3.10596	353	3.45344	352	1.79751	331	0.40279	351	1.22455	300	-1.65392	300	-1.79566	300	-0.711051	331	3.84557	332	1.62896	333	-1.14856	399	2.88915
	399	2.83331	395	12.8241	397	10.3556	383	6.50886	354	4.15497	353	3.18733	303	-0.831197	300	-3.65458	303	4.00353	399	2.27483	360	-1.29635	337	5.15343	337	1.18515	354	-8.0933	399	7.29979
	362	-5.62184	346	7.10547	394	1.56489	300	-1.08505	346	6.5782	353	2.47141	304	1.34289	356	3.51323	300	1.93341	399	-1.19842	300	4.27349	304	3.0465	305	5.35589	370	-3.49412	399	-0.753832
	399	2.04649	359	8.08756	398	10.5514	399	7.95339	358	1.74697	358	7.59015	397	1.61926	357	-0.724441	300	-1.13412	399	4.0231	300	3.8123	399	6.27338	330	2.11333	399	-0.894344	399	11.1135
	360	-3.40883	341	8.19538	396	7.50736	300	-0.80328	355	-1.41858	357	-4.39161	300	-0.931394	300	5.11143	300	-2.39113	360	-0.972403	369	-4.08521	300	-0.311619	358	-2.28184	358	1.33142	399	1.53693
	358	-2.9951	345	9.68222	349	8.36117	348	5.54387	346	5.27404	353	8.0017	399	12.4033	356	5.58953	300	0.259805	363	2.18301	399	2.34284	363	9.69377	335	8.93912	399	9.72974	343	3.96261
	362	-5.87076	360	7.46394	394	2.50234	318	4.31781	352	3.13208	352	2.82054	300	3.37125	300	0.05587	300	-0.996821	361	-1.17117	335	0.369648	329	4.98312	329	6.3234	335	4.41963	327	0.881179
	357	-7.46777	382	3.30003	399	3.35884	300	2.19768	353	0.300339	353	-1.17843	300	-0.299239	300	-0.858907	300	-2.8841	300	-2.6773	300	-0.176156	300	1.95427	300	0.61079	399	-0.290092	322	1.45683
	363	-5.44537	349	8.26214	349	3.83083	307	1.80445	348	-0.15362	350	-2.53454	392	-2.67098	355	2.96888	399	-5.52712	399	-1.0568	300	0.578962	305	-0.825808	300	-1.38137	394	1.14366	399	3.47448
	300	-9.68063	345	3.59554	378	5.43409	399	5.78143	369	1.98811	366	2.04394	300	11.5616	366	5.67994	300	-5.23154	399	-0.162151	399	2.76268	363	8.05277	398	5.69491	399	9.51066	399	1.57417

## Sheet: group-2
Go_N2
File	Fz		F3		FC1		Cz		C3		CP1		Pz		P3		F4		FC2		C4		CPz		CP2		P4		FCz
	latency	amplitude	latency	amplitude	latency	amplitude	latency	amplitude	latency	amplitude	latency	amplitude	latency	amplitude	latency	amplitude	latency	amplitude	latency	amplitude	latency	amplitude	latency	amplitude	latency	amplitude	latency	amplitude	latency	amplitude
	150	-1.41211	162	-1.71693	233	-1.42827	251	-4.30576	230	-0.704586	252	-0.383738	254	0.3481	255	1.63223	203	-0.018108	235	0.359342	212	0.248405	253	-1.0872	232	-1.71808	187	0.051392	237	-1.23692
	267	-4.926	231	-3.31646	299	-2.28343	297	-2.68409	221	-0.266112	208	-1.6977	195	-3.76118	180	-8.18442	222	-0.840231	273	-3.08688	214	-2.18617	232	-2.43079	293	-4.2343	192	-6.99697	294	-3.49268
	259	-2.42682	273	-2.55982	262	-2.43738	246	-3.72237	203	-0.470132	151	-1.06032	152	-0.058602	151	-1.21205	202	-0.954005	211	-0.579105	202	-0.379338	153	-0.497424	154	-0.782265	154	-0.86983	247	-2.89719
	196	1.34898	196	2.41944	291	1.11043	290	2.05287	197	1.85409	196	2.11582	179	-0.146924	172	-1.77662	166	0.658861	272	1.59014	272	1.35436	168	1.94126	195	2.5857	168	-0.652139	292	0.250372
	150	-0.109467	205	-0.854365	194	-0.445246	150	0.005407	197	-1.10641	198	0.019545	150	-0.319932	191	-2.21265	257	0.053735	164	0.194192	264	-0.159854	150	-0.187913	262	0.142399	262	-0.368157	150	0.126808
	255	-2.34686	255	0.276797	256	-3.97047	247	-3.48384	255	-1.50113	231	-0.584533	228	-3.23814	154	-6.47096	274	-0.413533	250	-4.14153	243	-5.33771	228	-2.19425	248	-2.71568	174	-5.63428	249	-2.88083
	187	0.42942	150	-0.073151	212	0.691628	215	0.835778	214	0.294039	199	0.267739	193	2.95051	150	-3.13764	191	1.57521	205	0.371048	217	1.02876	212	1.00548	213	1.97969	192	2.6262	212	0.747481
	195	1.55196	187	0.088079	293	2.51758	186	2.52456	185	1.46451	188	1.01192	189	0.034528	190	-1.62944	188	2.69368	185	3.24057	186	2.60602	187	1.41008	184	1.21877	292	-0.475922	195	2.53131
	233	1.24145	163	-0.582017	242	0.80816	205	0.815391	284	-0.506324	212	-2.50251	213	-0.726428	150	-2.92267	222	-0.957518	150	1.31117	153	-4.72569	218	-2.5758	205	-0.242393	152	-4.63333	254	-0.059632
	178	-0.308949	193	1.25871	193	0.868403	200	2.0595	192	0.169825	198	1.37773	218	1.90057	194	0.635727	206	0.622957	180	0.134712	178	0.719633	202	1.70854	179	1.11328	173	-1.6684	177	0.192073
	276	0.066875	155	-1.13659	151	-1.63715	152	-1.2354	152	-1.65301	271	-1.37844	152	-1.62249	152	-1.83607	193	0.34172	192	-0.582867	200	-0.055949	152	-1.15925	202	-0.576099	150	-4.05864	182	-0.474709
	299	-2.02511	299	-1.69643	299	-0.766541	294	-1.77198	299	0.179104	278	1.24833	182	-2.13437	182	-3.26887	299	-0.985409	296	-1.31614	278	0.559921	277	0.219832	278	0.019573	181	-2.98439	298	-2.66235
	219	-1.85266	209	-1.6528	223	-3.07157	219	-2.4348	218	-1.49228	219	-0.855684	167	-0.494713	174	-4.12897	213	-0.020765	223	-4.46396	219	-1.12334	213	-0.407245	238	-0.618385	299	-0.451265	199	-1.22649
	157	-1.53232	150	0.513126	179	0.82396	177	-0.187113	150	1.14922	162	-0.169931	162	-0.621082	150	-2.62864	165	-0.897963	165	-0.983355	170	-0.553043	165	-0.247975	172	-0.757395	164	-2.55026	178	-0.362861
	243	-1.86928	242	0.641945	242	-0.928265	241	-1.32295	150	0.362168	155	-4.50452	150	-4.56851	162	-3.88421	232	0.609948	235	-1.1162	182	-0.839441	150	-4.55207	150	-2.81758	150	-18.8049	243	-1.89448
	197	1.30903	164	-0.5	238	1.27103	223	1.06972	205	1.08428	204	1.2296	198	1.57538	159	-3.15762	174	0.853703	225	1.17296	150	2.11632	225	1.57272	150	0.106759	164	-0.518695	224	0.88756
	150	0.364479	218	1.56626	229	-2.77963	231	-3.10177	217	0.172451	217	-0.036235	203	1.70463	150	-4.52503	150	1.95446	235	-1.07019	242	-1.90234	225	-2.72526	232	-1.1981	150	0.528107	234	-3.45833
	229	-6.62633	216	-1.33202	230	-1.75319	215	-0.363826	215	-0.29262	156	3.27255	150	2.0916	155	1.78437	205	-7.58949	202	-1.88088	200	0.876842	153	1.78183	157	-1.26923	151	-4.47229	216	-3.2839
	252	-1.04875	151	-0.524836	268	-0.499533	239	-1.02842	184	-0.759504	239	0.349231	150	1.14145	150	-4.47732	150	-2.15159	269	-0.549133	266	-0.41589	236	-0.0992	264	-0.382296	151	-3.27191	269	-1.02876
	212	-13.62	222	-9.66012	212	-11.059	212	-9.98284	212	-10.4109	173	-3.41299	184	-6.92878	168	-3.38638	207	-7.41158	213	-13.8713	210	-11.4032	189	-2.56695	222	-3.87001	150	-11.6027	209	-12.1578
	246	-1.49621	240	-1.42428	239	-0.653742	240	-2.68489	239	-1.46519	239	-1.7242	229	-0.384664	231	-1.20003	237	-0.566394	238	-0.787782	239	-2.23653	230	-1.06441	238	-1.46499	230	-0.313913	240	-1.04063
	189	1.58094	190	-0.509198	189	2.45238	199	3.34688	256	-0.258395	188	2.34099	193	2.27213	181	0.678055	164	1.62884	188	4.19783	160	-0.462704	213	3.12049	187	2.34472	179	-4.02348	190	3.10668
	267	-4.92699	231	-3.31627	299	-2.28365	297	-2.68411	221	-0.265332	208	-1.69658	195	-3.76085	180	-8.18445	222	-0.840757	273	-3.08732	214	-2.18618	232	-2.43055	293	-4.23455	192	-6.99789	294	-3.49332
	226	-3.21841	250	-2.68039	221	-4.44902	223	-6.72669	222	-3.76254	219	-4.83751	206	-2.25914	164	-11.5933	218	-3.86084	221	-2.38866	219	-4.45505	228	-1.60594	220	-3.6902	190	-3.95491	221	-3.83862
	225	-0.600962	207	-0.165254	245	-0.838565	245	-0.589581	220	-2.24164	221	-2.27232	150	1.84053	164	-9.17276	224	2.82953	248	-0.771125	247	0.647752	229	-1.90616	225	-0.446106	150	-0.685487	247	-1.69965
	282	0.284787	229	0.654897	283	-0.216718	238	-0.915172	234	0.764745	235	-0.923483	227	-1.24749	225	-1.88907	230	-0.315573	237	0.176094	237	0.887021	236	-0.97278	229	-0.323068	186	-3.33473	284	-0.979778
	220	-1.60708	150	-1.83697	258	-0.125536	202	-1.12569	259	-1.50375	150	-0.425978	150	-2.07021	150	-4.26583	202	-0.509199	202	-2.966	204	-2.68577	217	0.034624	204	-1.42079	150	-3.17707	200	-1.73714
	197	-4.30412	161	-2.75188	253	-3.09333	198	-1.19211	172	-3.90205	187	-5.05985	165	-7.4389	170	-9.54343	162	-3.40072	189	-1.30798	177	-0.92073	197	-5.63424	193	-3.9598	157	-6.9977	299	-4.01051
	158	-0.594939	150	-0.391465	154	-0.483713	150	-0.481501	169	-0.818113	198	-0.628778	205	-0.532268	201	-0.681043	167	-0.832146	151	-0.535511	198	-1.19375	150	-0.226162	206	-0.783841	207	-0.858319	150	-0.479303
	150	-2.18748	219	0.646071	286	-0.605632	286	-3.42067	254	0.736102	284	0.482123	193	-3.62588	180	-6.05005	150	0.043234	286	-1.63971	286	-0.439608	288	-2.1067	224	-0.891392	201	-6.27004	150	-0.627476
Go_P3
File	Fz		F3		FC1		Cz		C3		CP1		Pz		P3		F4		FC2		C4		CPz		CP2		P4		FCz
	latency	amplitude	latency	amplitude	latency	amplitude	latency	amplitude	latency	amplitude	latency	amplitude	latency	amplitude	latency	amplitude	latency	amplitude	latency	amplitude	latency	amplitude	latency	amplitude	latency	amplitude	latency	amplitude	latency	amplitude
	437	0.620321	300	-0.437565	360	-0.553555	407	2.84939	322	0.577023	361	2.2019	411	4.38886	357	6.17679	487	1.29456	437	4.68711	499	4.01827	492	3.14952	439	1.42924	366	2.31639	411	2.62517
	488	0.079534	489	1.37075	488	0.169724	487	2.25059	476	3.58773	472	4.46977	474	4.23451	300	4.92342	485	5.26813	487	3.00977	415	6.23454	487	2.92758	487	3.9228	337	6.50683	487	1.39551
	379	5.04108	360	5.34051	360	5.44008	360	5.88298	361	6.18444	361	6.51949	360	8.0264	361	6.43464	376	5.77021	358	5.51377	377	5.56867	377	5.63515	377	5.08482	377	4.62097	359	4.54
	343	2.10118	376	3.53615	342	2.37456	325	3.44534	325	2.92534	325	3.69446	306	3.29561	492	1.9767	322	3.43804	324	3.4983	324	3.24062	334	4.42239	324	4.54724	306	3.52382	342	1.32288
	380	2.06486	409	2.46324	426	2.5715	381	4.20967	498	4.65541	470	7.89756	469	10.0596	484	10.2559	437	3.14947	379	4.24055	435	4.862	425	7.62648	424	6.53226	426	8.34431	379	2.01254
	343	-0.025336	336	1.93036	488	1.36065	499	6.61339	498	3.25453	499	11.4724	499	2.41283	499	1.85172	483	1.1022	408	1.9428	418	1.8074	485	11.0084	367	2.31783	300	-0.282216	332	1.3359
	300	2.70849	315	6.41837	314	3.22086	319	4.81467	314	4.03376	314	5.05566	335	9.06962	468	3.84863	300	4.72421	315	2.2904	333	4.72012	335	5.37775	318	6.16206	307	5.27422	317	3.2603
	489	3.5513	325	4.42408	323	3.01408	324	4.38347	326	3.46219	325	4.19215	495	3.9991	326	3.43037	316	6.36576	310	6.00798	310	5.39612	325	5.42076	311	4.99657	493	1.65427	316	3.40574
	359	4.8006	342	1.37277	360	2.21584	370	4.65449	499	0.348533	499	1.32997	480	3.7634	449	2.69133	300	0.320229	404	4.69993	477	6.62954	480	3.59936	371	4.80269	309	6.25709	359	1.54792
	410	3.22034	444	4.71215	368	3.5057	410	5.98315	373	3.79235	374	6.97004	409	7.85023	403	5.38901	411	5.96752	403	4.25997	400	6.44261	407	7.18161	401	8.40449	399	6.57567	404	3.49411
	335	0.604612	473	0.300252	476	1.43486	476	2.40833	476	1.49781	476	2.50567	476	4.55053	475	4.49437	458	4.28617	460	2.53165	473	4.96295	476	2.5248	485	5.82056	449	3.44938	306	-0.322657
	423	1.35352	409	-0.510629	407	1.51842	405	4.68917	406	2.57861	400	6.41564	396	6.81895	395	6.68515	425	4.34029	422	4.54923	421	5.40409	402	7.42504	399	7.55699	395	6.13884	408	1.92759
	418	4.06332	420	3.79793	460	1.71496	486	3.46762	488	3.7393	494	2.3715	341	0.643026	460	2.62495	422	4.32961	478	2.89227	490	2.37139	480	3.32188	374	1.96328	341	-0.191799	419	0.77636
	300	2.40614	300	5.50461	319	5.49187	319	6.13214	300	5.80817	300	7.31777	300	6.31935	300	6.49661	318	6.04635	354	4.80352	354	8.51753	317	6.97434	356	8.19682	358	6.67416	319	3.72555
	449	3.92081	490	4.29517	402	3.86273	406	4.58905	490	5.07445	485	-0.605671	376	2.80924	499	-0.561997	376	4.70032	410	4.9363	377	4.67998	376	2.78116	376	4.43326	300	2.48198	447	4.57132
	336	4.51899	300	3.63599	333	2.5359	333	3.32635	348	3.36945	348	4.35602	348	6.55166	403	6.65556	473	5.42599	334	3.00878	333	8.03464	323	4.32168	348	5.6894	300	5.34178	332	2.74377
	369	2.43179	381	5.22878	396	3.25691	396	3.38436	395	8.44841	395	8.00262	396	8.25404	394	8.66932	365	6.33579	377	2.89991	375	0.223604	395	3.07554	377	3.08343	381	5.91576	381	0.827405
	355	4.05943	305	3.48897	320	3.61426	310	5.33847	305	5.29304	300	6.7967	300	8.15297	427	7.026	391	9.2937	404	5.90756	404	8.53771	300	6.31433	442	8.54886	426	9.40161	354	3.54825
	488	0.612812	348	1.33027	395	1.02621	499	1.87471	321	1.49048	349	2.6153	369	5.88366	326	3.96288	321	1.51732	391	2.62975	355	3.41652	467	3.87505	392	4.28447	358	7.08759	392	1.04391
	465	-0.232085	476	-1.59393	463	-1.94808	470	2.42075	471	-0.52658	443	2.59131	447	-2.60908	445	2.18666	392	4.92322	398	0.409207	397	3.16909	460	2.10222	478	2.13532	309	4.50625	463	1.93008
	482	1.31776	485	1.81086	302	1.5209	300	0.021628	485	1.44023	483	2.18897	418	4.92791	485	3.09258	459	4.41798	461	3.21891	467	3.45834	459	2.74983	461	3.71377	372	5.92514	300	0.905723
	352	14.6184	381	9.17564	354	11.0357	353	15.8765	356	6.53697	382	9.84955	383	12.0923	382	10.6827	353	11.2052	351	15.7124	407	7.57932	421	10.7836	408	10.8143	408	4.70334	347	16.7051
	488	0.078852	489	1.37097	488	0.169844	487	2.25083	476	3.58826	472	4.47041	474	4.23491	300	4.9234	485	5.26742	487	3.00952	415	6.23435	487	2.92845	487	3.92314	337	6.50773	487	1.39528
	406	1.67264	380	1.11527	385	2.47033	386	3.11502	347	0.762344	352	2.25549	433	2.71201	489	-2.83736	347	3.00163	412	4.03214	410	5.04226	412	3.73281	383	7.00269	377	4.21215	382	2.61849
	386	5.96704	373	5.75674	389	4.58582	373	4.71353	478	5.29277	374	8.06742	373	10.4759	313	4.85368	341	7.83041	374	5.72936	364	6.80213	374	7.06375	373	8.34272	340	7.42626	371	4.47688
	471	3.83705	499	6.44854	499	3.55122	499	3.93498	498	5.84102	499	5.82182	435	4.56065	498	4.43215	437	6.27192	472	4.60844	431	6.77547	499	5.19749	430	5.995	335	2.40171	499	2.19174
	430	1.34086	313	3.24716	474	2.72193	476	6.05432	492	1.5345	477	2.89121	312	2.75931	312	1.98999	387	4.00064	461	8.52317	457	7.61447	476	5.13323	456	7.30081	310	4.27503	448	3.69708
	457	1.80248	302	5.23344	499	0.002259	465	3.19835	499	1.46614	447	8.76413	443	1.90174	457	1.88998	325	6.60949	446	5.95224	341	9.04175	447	5.24883	446	5.31722	300	9.96728	499	2.10635
	300	0.747345	322	-0.07801	315	0.40687	300	0.757797	488	1.5893	461	3.08285	461	3.31582	462	3.10968	459	1.81039	300	0.643318	464	3.93424	461	2.39869	463	3.61307	462	3.47111	300	0.821268
	411	2.99285	367	7.74997	378	1.81847	381	1.44248	345	2.2064	380	3.82566	381	3.03336	379	0.292908	380	4.7984	381	4.56447	382	5.75688	382	3.93739	381	6.84615	380	2.49143	380	3.84027
NoGo_N2
File	Fz		F3		FC1		Cz		C3		CP1		Pz		P3		F4		FC2		C4		CPz		CP2		P4		FCz
	latency	amplitude	latency	amplitude	latency	amplitude	latency	amplitude	latency	amplitude	latency	amplitude	latency	amplitude	latency	amplitude	latency	amplitude	latency	amplitude	latency	amplitude	latency	amplitude	latency	amplitude	latency	amplitude	latency	amplitude
	150	-1.64122	162	-2.03364	226	-1.3024	251	-4.80581	299	-1.36906	258	-0.625738	258	-0.118073	260	0.293439	201	0.259009	257	1.05068	228	1.09375	256	-1.63916	242	-2.01735	252	0.065215	251	-1.69155
	299	-3.88463	229	-2.91484	244	-2.07371	287	-2.66906	229	-1.55515	205	-3.25695	192	-5.4316	179	-10.1941	261	0.158146	264	-1.9057	199	-1.48575	299	-2.61417	267	-3.48728	190	-9.25675	268	-2.77819
	264	-2.07559	244	-1.3419	266	-1.41349	265	-2.44424	186	0.147839	150	-0.344163	186	0.409425	150	-0.567781	198	0.459502	192	1.20773	188	0.748606	185	-0.149756	172	-0.251879	159	-0.41413	265	-2.27083
	207	-1.59831	207	-1.02764	211	-1.93098	211	-1.00788	207	-1.7817	206	-1.39527	200	-1.10395	156	-3.14846	199	-1.13508	212	-1.24297	204	-1.45083	205	-1.22672	205	-1.3119	152	-2.04424	212	-1.18657
	241	-0.328813	189	-0.378302	227	-0.015987	224	-0.270207	187	-0.855857	176	-0.504895	173	0.166263	182	-2.95462	261	-0.618369	224	-0.304479	272	-1.15946	223	0.05498	225	-0.487235	223	-0.735554	229	-0.697045
	228	-3.21301	227	0.179813	231	-3.76702	228	-4.49916	229	-2.6463	229	-2.66028	249	-5.74114	161	-6.96052	299	0.415021	240	-4.08219	290	-4.52039	230	-2.99173	245	-3.1982	176	-6.99868	228	-3.23786
	183	-0.180031	173	-0.114295	214	0.312566	218	0.531599	219	-0.502402	205	-0.935276	189	2.10929	150	-3.48094	183	1.12228	241	-0.229386	245	0.569939	227	0.503196	244	1.68682	178	1.77244	206	0.541595
	198	1.42979	176	-0.45601	181	2.08562	188	2.04709	174	0.565185	176	0.518125	189	-0.802693	175	-2.59198	188	3.21604	176	3.14799	188	2.7961	190	1.23473	177	0.606659	294	-1.66162	189	2.45147
	225	0.127119	175	-0.608729	227	0.519195	217	0.523466	214	-0.68289	204	-2.27528	216	-0.175044	157	-2.88923	292	-1.66353	225	0.722303	155	-4.42752	216	-2.03895	224	0.524486	153	-4.67596	279	-0.763176
	185	-1.15406	183	0.965968	184	0.481951	209	1.80801	183	0.01016	210	1.40773	210	1.28728	184	0.484629	207	-0.94794	185	-0.626057	201	-1.02714	209	0.928654	202	0.243849	200	-1.93001	184	-0.513422
	258	-0.772447	150	-1.23037	165	-1.68606	165	-1.1053	166	-1.6718	165	-1.22434	151	-1.68247	152	-1.82581	258	-0.650326	188	-1.22396	221	-1.15116	165	-1.09792	277	-1.29166	150	-5.21681	295	-0.204843
	150	-1.32434	150	-2.24206	281	-0.969011	282	-2.13979	278	-0.583266	277	-0.047857	188	-3.92798	188	-7.00056	150	-1.39984	283	-0.692805	281	0.209881	280	-0.834137	282	-1.51938	186	-4.06033	283	-2.15897
	185	-1.04633	186	-0.719238	299	-2.07236	220	-1.95915	219	-0.812396	222	-0.866155	155	-0.710545	174	-4.23389	219	0.52788	221	-3.82124	219	-0.717553	232	-0.783767	209	-0.525532	248	-0.577811	184	-1.2631
	159	-1.50765	150	0.884199	178	1.01955	169	0.443388	162	1.91817	166	0.481835	161	-0.798948	150	-1.99664	164	-0.586737	163	-1.26587	168	-0.693817	168	-0.015161	169	-0.096935	161	-3.13046	169	0.328229
	225	-0.204267	222	0.905788	223	-0.105157	223	-0.310813	201	0.23885	157	-4.47116	150	-4.98948	157	-3.6261	203	0.853309	203	0.361451	156	-1.46777	150	-4.98954	150	-3.14849	150	-22.5011	230	-0.317387
	184	0.988988	164	-0.824082	224	1.58124	222	1.33042	199	1.23924	201	0.361127	195	1.08627	168	-3.72514	170	0.936389	219	1.2535	155	2.22533	247	1.34876	156	0.220151	168	-0.35768	218	0.744596
	156	0.831876	208	1.79994	213	-2.54326	214	-2.90068	200	0.277131	198	-0.264412	198	0.489484	150	-5.75932	164	2.87744	240	0.067501	297	-0.699678	217	-2.04894	214	-0.233716	150	1.32242	229	-2.89222
	218	-6.22087	219	-0.928304	220	-0.900883	203	-0.130203	219	1.09787	172	3.06823	150	3.67578	172	0.94922	201	-8.79968	199	-1.23042	185	0.447789	172	1.83032	171	-1.63309	171	-3.40047	218	-3.00836
	247	-1.67019	221	-0.68104	245	-1.27361	223	-1.81089	155	-1.49479	235	-1.07178	237	-1.14276	156	-5.59344	156	-2.85674	237	0.055946	206	-1.47438	223	-1.7734	238	-1.26824	156	-3.57809	235	-0.936737
	239	-6.32719	225	-4.64421	237	-4.32798	230	-4.42338	226	-3.84659	167	-5.79768	174	-4.16263	150	-4.58216	213	-0.751148	231	-6.54013	231	-3.95795	174	-1.57671	216	-1.54891	157	-10.7997	232	-4.13805
	242	-1.44029	248	-0.091832	244	0.016267	242	-1.88528	244	-0.573606	244	-1.17007	263	0.172086	249	-1.36073	240	0.362653	237	-0.342637	236	-1.03739	243	-0.252239	236	-0.836346	234	-0.339713	242	-0.732948
	191	1.17525	192	-1.47006	193	1.94548	195	2.14459	192	-0.085284	194	-0.625556	194	0.27981	191	-0.764434	157	0.28796	156	2.41342	158	-2.6542	195	0.957672	192	-0.169259	163	-5.5926	193	2.17296
	299	-3.88564	229	-2.91487	244	-2.07374	287	-2.66895	229	-1.55475	205	-3.25622	192	-5.43131	179	-10.1942	261	0.157178	264	-1.90611	199	-1.48569	299	-2.61353	267	-3.48736	190	-9.25769	268	-2.77858
	215	-3.68707	223	-1.97148	214	-4.761	216	-8.6688	213	-2.61602	208	-5.01114	213	-4.75112	171	-11.9207	211	-4.81665	214	-3.41755	213	-5.63	223	-3.35952	215	-6.33603	191	-6.67125	214	-4.93155
	233	-0.0528	229	0.185288	230	-0.698468	249	0.757305	230	-1.64532	230	-1.33686	228	1.08931	158	-9.29178	181	1.52466	250	-0.374742	248	0.686369	230	-0.765791	230	0.556974	150	-0.396925	249	-1.20093
	291	-0.588422	252	-1.51343	258	-0.823613	260	-1.63647	252	-0.591446	252	-1.18485	226	-1.68905	223	-2.87048	228	-0.943829	260	-0.17178	228	-0.03084	259	-1.21723	226	-1.1031	189	-3.89235	289	-1.58351
	216	-1.47034	158	-3.0675	228	-0.319475	222	-1.62856	249	-1.52967	249	-0.111903	150	-2.72913	150	-5.0798	179	-3.93386	221	-2.73094	221	-2.79707	221	-0.260916	221	-1.94838	150	-3.36522	218	-2.08173
	225	-4.04636	157	-6.11707	253	-3.35281	224	-1.21987	254	-6.17792	177	-5.89983	172	-7.90946	172	-11.7662	167	-5.80647	177	-1.8037	176	-1.81175	185	-5.20382	182	-3.63088	161	-7.98597	299	-4.40721
	154	-0.924377	150	-0.176944	165	-0.443843	150	-0.398531	177	-0.503293	184	-1.04404	184	-0.751267	182	-1.07192	152	-0.772749	150	-0.55657	186	-1.19414	150	-0.844626	210	-0.801438	200	-0.908177	150	-0.340973
	150	-0.588385	214	1.76611	259	0.665403	284	-2.74518	245	1.79173	206	0.053599	203	-3.26917	192	-4.06001	230	0.767413	283	-0.931505	260	0.725404	283	-2.68833	277	-1.13105	201	-6.31163	150	0.823297
NoGo_P3
File	Fz		F3		FC1		Cz		C3		CP1		Pz		P3		F4		FC2		C4		CPz		CP2		P4		FCz
	latency	amplitude	latency	amplitude	latency	amplitude	latency	amplitude	latency	amplitude	latency	amplitude	latency	amplitude	latency	amplitude	latency	amplitude	latency	amplitude	latency	amplitude	latency	amplitude	latency	amplitude	latency	amplitude	latency	amplitude
	491	0.376454	314	0.269575	464	0.175449	493	4.2455	371	1.25873	372	2.43065	485	4.39002	409	6.55257	475	1.79844	474	6.43768	463	6.3146	489	3.28096	466	2.02936	475	3.85158	490	3.27278
	499	1.79338	473	2.73253	499	1.75592	498	1.32487	489	4.74125	491	4.06444	339	2.37716	339	3.39628	499	6.05439	499	4.45942	499	7.85077	499	1.56969	499	5.90387	473	5.01107	499	1.58725
	467	8.15614	419	8.04367	467	9.08598	497	11.7242	399	8.02879	398	8.29183	345	9.11175	398	8.16803	337	8.51109	467	10.6329	467	9.34417	343	5.80897	336	5.10754	360	4.75724	468	10.7763
	471	7.69875	475	9.61178	473	8.67047	472	8.16251	471	10.3793	472	11.7723	305	2.87875	300	0.952715	469	8.53413	471	10.6259	471	8.70079	470	4.34733	471	11.6056	396	3.25761	471	8.82797
	460	1.60905	413	2.90608	460	3.23183	453	4.2273	409	4.13685	451	5.92671	450	7.76939	406	7.79873	437	2.22171	461	3.86066	458	3.97092	451	6.34535	450	6.17678	450	7.78845	458	1.87393
	490	8.15888	494	11.7451	491	11.8496	497	6.13802	495	11.1796	495	8.87878	492	1.64938	497	0.170146	468	3.76533	499	9.94824	499	5.89246	492	6.60222	483	4.31475	394	-1.62732	486	5.40039
	499	3.65848	360	8.97579	320	5.24099	331	6.66213	320	6.36017	314	7.37538	333	11.1956	375	3.7735	334	5.19998	313	3.86184	333	6.96786	331	7.64034	332	8.54068	333	5.92093	332	4.26881
	495	4.20359	499	4.58887	499	4.19332	499	5.26053	330	4.11955	499	4.48507	498	4.95964	499	2.73977	351	8.2164	496	7.09021	495	6.57753	499	6.14521	498	5.92212	499	2.29295	497	4.75603
	454	5.46105	493	2.55313	464	3.99206	359	6.31672	499	1.98018	352	0.70978	356	5.02549	346	4.71296	300	-1.55553	407	5.70091	348	5.52375	480	5.40808	358	6.36621	404	6.03779	451	2.59011
	458	4.50742	416	7.73125	414	4.94657	415	7.48391	413	4.98475	414	10.253	414	9.58267	413	6.89778	392	5.75965	462	5.20195	479	7.70457	414	8.44707	417	9.8696	315	6.53932	461	4.45823
	358	0.668126	445	1.39987	433	2.38556	433	3.10837	433	2.4699	433	3.05408	424	4.73004	434	4.34395	322	1.91281	478	1.20002	456	3.16516	433	3.08139	446	4.13808	445	2.36109	306	-0.135717
	443	3.06239	362	0.558468	361	1.68722	409	6.11375	362	3.00712	402	6.31212	399	6.35811	390	5.3623	444	4.88043	410	6.18674	408	7.23824	406	8.24887	407	8.36229	399	6.09477	411	3.47538
	493	7.29438	493	6.19115	489	6.21348	429	3.45032	495	4.52991	492	2.31806	302	0.248797	496	1.34016	467	5.23621	469	7.54228	480	1.94074	394	1.97664	428	2.66623	302	0.174513	468	1.57954
	389	2.61779	326	7.0898	474	10.6588	477	9.22703	340	8.43245	354	9.19642	391	7.75539	300	6.05668	390	7.05191	463	8.35556	449	9.77873	342	7.37279	404	10.16	391	6.40063	477	6.22224
	488	6.44146	445	5.16014	446	5.51082	490	5.89109	492	4.56432	326	-1.69988	446	2.77039	326	-1.38777	373	5.39899	485	6.62016	318	4.5794	446	2.74353	395	4.2614	307	0.823676	487	6.7121
	317	4.23821	305	4.24352	360	3.87478	361	4.20367	358	4.59027	363	4.53204	328	6.80648	338	4.51367	363	6.33369	364	3.49446	315	10.0472	314	3.90655	322	7.2781	306	6.46726	363	2.92823
	499	2.83918	499	5.90683	471	6.77773	470	7.16558	472	11.2236	470	10.5246	471	7.6646	469	6.35053	357	5.34954	471	5.69083	499	2.30238	470	6.93589	470	5.97338	471	5.67608	469	4.46544
	499	6.11575	351	6.18264	352	7.02773	351	7.52929	350	8.34329	348	9.61575	347	11.0238	394	9.63871	492	10.0081	492	6.52763	351	9.27454	348	8.7691	438	7.66231	439	9.75672	397	5.38051
	388	2.57945	360	1.40652	389	2.32426	389	2.38645	359	3.30212	387	5.03992	360	7.11167	357	4.69008	306	1.70529	499	4.22565	387	4.93545	388	6.66887	388	6.78111	358	6.79439	482	2.43726
	499	18.7968	499	10.1819	499	11.7639	499	12.3711	499	12.6059	300	6.51873	300	4.44999	478	4.3091	499	11.2385	499	11.3457	499	14.0372	300	4.84464	378	5.90169	408	6.68045	499	13.7329
	497	10.1956	484	8.45498	487	9.59894	499	9.04156	487	9.4659	499	8.85127	486	4.84199	499	7.91863	499	8.30234	499	7.73094	499	8.28526	487	4.54868	487	6.99416	485	7.04494	498	9.07026
	345	15.7936	451	14.5204	451	13.7899	479	18.2182	451	11.0261	449	9.21825	450	11.3861	447	9.07696	345	10.2558	345	16.1062	469	7.71262	479	10.8391	469	9.3476	467	2.88929	345	18.0547
	499	1.79251	473	2.73237	499	1.75621	498	1.3256	489	4.74236	491	4.06578	339	2.37748	339	3.39624	499	6.05356	499	4.45939	499	7.85088	499	1.57065	499	5.90505	473	5.01137	499	1.58718
	499	5.40612	491	4.68632	499	8.97902	471	10.6527	458	3.42254	499	5.61476	474	5.87892	487	-3.1673	499	4.32906	375	5.05644	499	6.30335	499	6.73932	499	10.2057	499	4.73692	499	7.17913
	489	6.64135	325	8.16733	408	7.80667	469	7.14514	339	7.43074	363	9.90626	336	13.0001	321	7.3477	301	7.86978	481	8.94528	478	8.26181	499	10.4615	481	10.4585	324	8.99067	470	7.24545
	399	3.83089	477	6.29641	492	3.79962	388	3.81962	478	5.54885	489	5.58264	433	4.93544	433	3.84179	390	7.50886	494	5.44665	387	6.91804	433	5.63259	434	6.0262	440	2.47164	493	2.43176
	396	2.3303	349	4.44214	491	6.74789	453	7.43371	349	3.43371	347	4.53052	314	0.378752	351	2.118	314	1.11773	450	10.7987	392	6.24712	346	5.51996	390	6.80048	318	2.45662	452	7.36504
	337	0.435941	343	4.43271	373	-0.458607	350	2.18433	338	2.79782	350	12.4482	351	4.88496	350	1.5436	341	4.56559	468	4.8151	349	9.37537	351	7.34923	350	9.6775	351	13.8968	471	0.344661
	493	0.962936	300	0.225618	499	0.525987	315	0.866762	398	1.81543	400	3.1054	400	3.6106	398	3.2354	393	1.65674	315	0.808592	404	4.36197	401	1.47561	404	4.22989	404	4.25899	315	1.01271
	496	5.83702	466	11.6383	497	6.01089	498	1.12994	498	5.98792	499	4.46108	353	0.36767	308	0.237927	496	6.25556	496	5.69785	495	7.03725	499	1.18695	499	3.40323	363	0.833202	495	5.15483
diff_N2d
File	Fz		F3		FC1		Cz		C3		CP1		Pz		P3		F4		FC2		C4		CPz		CP2		P4		FCz
	latency	amplitude	latency	amplitude	latency	amplitude	latency	amplitude	latency	amplitude	latency	amplitude	latency	amplitude	latency	amplitude	latency	amplitude	latency	amplitude	latency	amplitude	latency	amplitude	latency	amplitude	latency	amplitude	latency	amplitude
	243	-0.648652	177	-0.916189	249	-0.069438	152	-1.03441	222	-0.74675	154	-0.366166	249	-0.426336	221	-1.41912	249	0.199697	249	0.647767	150	0.092362	249	-0.483653	243	-0.452784	249	-0.585322	249	-0.427725
	152	-0.017157	193	-0.60731	195	-0.56754	196	-0.375006	197	-1.66778	199	-1.69586	190	-1.7596	247	-2.98236	189	0.209403	150	0.56568	194	-0.58162	191	-0.507825	195	-0.668127	190	-2.27676	195	0.244989
	185	-0.521533	167	-1.47266	167	0.703004	190	0.613735	169	0.028557	187	0.051416	185	-0.09783	188	-0.056908	186	0.534013	186	0.349308	187	0.17935	185	-0.343447	185	-0.360123	185	-0.36797	190	0.495732
	212	-3.56935	210	-3.98388	211	-4.58668	211	-3.89227	209	-4.16998	211	-4.10567	202	-1.61619	157	-1.73742	213	-2.85058	212	-4.41877	213	-3.91771	212	-4.18339	211	-4.77553	214	-2.59315	211	-3.30113
	223	-0.745225	235	-0.191501	226	0.176845	178	-1.10186	166	-0.38778	176	-0.775625	177	-1.15688	180	-0.867866	206	-0.860728	224	-1.42795	223	-1.42435	177	-1.00561	224	-1.23125	176	-0.676051	225	-0.980241
	223	-3.49383	224	-3.43626	220	-2.04445	215	-2.19934	224	-3.36373	229	-2.08533	249	-2.77511	168	-1.09928	150	-0.407644	203	-3.42594	201	-2.8728	164	-1.6177	201	-2.26113	249	-3.36048	213	-1.89973
	174	-0.925038	189	-1.02063	174	-1.15519	173	-1.13693	175	-1.34751	174	-1.68118	249	-1.63054	205	-2.02846	249	-1.41212	175	-1.11243	249	-1.34426	245	-1.19375	248	-1.83943	249	-2.30471	172	-1.10219
	159	-1.38918	249	-1.01474	161	-1.18619	166	-0.915792	169	-1.06615	161	-1.45195	161	-2.15646	249	-1.93834	249	-0.913076	210	-0.805505	249	-0.214467	162	-0.9497	249	-1.12029	249	-2.10226	160	-0.833011
	223	-1.32164	203	-0.281795	217	-0.607463	226	-0.495751	162	-0.994679	159	-0.045854	235	0.513411	162	-0.552893	158	-0.930212	226	-1.59692	159	0.122543	235	0.492639	233	0.004639	235	-0.408091	225	-1.16489
	227	-1.43495	226	-0.715708	226	-0.67897	210	-0.354138	215	-0.748351	212	-0.290299	209	-0.757866	211	-0.787488	208	-1.58641	211	-1.1019	211	-2.24122	210	-0.905687	210	-1.52532	236	-2.44228	227	-1.01625
	157	-0.63981	150	-0.176757	167	-0.885643	167	-0.563701	168	-0.870772	168	-0.637778	167	-0.53776	167	-0.645285	218	-1.76597	219	-1.40457	221	-2.16573	167	-0.601453	228	-1.31865	227	-2.3989	150	0.126915
	153	-0.490623	202	-1.62807	203	-2.05792	234	-2.78029	202	-3.57327	231	-3.96505	233	-4.67014	198	-5.13981	246	-1.20143	236	-1.94334	236	-3.18221	233	-3.96863	235	-4.65946	234	-4.46433	237	-1.46126
	181	-0.887341	179	-0.366958	182	-0.43776	172	-0.48884	150	-0.282834	150	-0.815413	249	-0.794889	150	-1.25828	171	-0.01249	175	-0.346948	153	0.006266	249	-1.1747	178	-0.343506	202	-0.715707	176	-0.269517
	249	-0.847581	187	-0.398576	223	-0.435204	249	-0.534727	201	0.051763	231	-0.561379	231	-1.4514	230	-1.31886	249	-1.14566	249	-0.936609	248	-1.60979	249	-1.34125	249	-1.3364	249	-2.3481	249	-0.300085
	198	-0.289542	194	-0.410772	196	-0.684034	198	-0.548085	195	-0.72242	249	-0.676096	159	-0.877918	249	-0.656741	202	-0.139987	201	-0.474843	156	-0.837352	160	-0.827165	158	-0.655663	157	-3.96257	200	-0.780748
	182	-0.703062	238	-0.761971	199	0.139294	199	-0.137705	200	0.117028	212	-0.905327	169	-0.594514	244	-1.38543	227	-0.082865	201	-0.101842	192	-0.061254	193	-0.380002	223	0.019442	244	-0.635421	200	-0.35569
	194	0.273365	196	-0.271443	197	-0.875717	199	-1.01563	188	-0.823125	194	-0.883971	197	-1.30552	180	-2.17866	196	-0.907664	197	-0.815778	196	0.02563	197	-0.600833	197	-0.521894	197	-0.732455	198	-0.525715
	187	-1.8373	150	-1.1998	150	-1.3636	173	-1.35424	176	-0.791846	174	-1.18445	173	-1.27337	173	-2.00148	185	-1.7156	173	-0.382245	172	-1.4151	173	-1.50585	172	-1.22888	172	-1.60653	186	-1.27516
	165	-1.27715	245	-0.709884	245	-0.947135	220	-1.16896	164	-1.15954	163	-1.63189	244	-2.66207	191	-2.83826	164	-0.952419	219	-1.48222	206	-2.41386	219	-2.54906	207	-1.80517	191	-3.56531	220	-0.948404
	150	1.79706	150	0.904772	150	1.51896	150	-0.123478	150	1.54845	163	-2.56742	150	-1.0696	150	-1.96286	150	2.3533	150	1.31655	150	1.44544	150	-0.22447	150	-0.194932	192	-6.17343	150	0.970115
	190	-2.35386	191	-1.48386	190	-1.64561	190	-2.50479	191	-1.99629	191	-1.93748	175	-0.761456	191	-1.33401	189	-1.40684	189	-1.81905	189	-1.62935	189	-1.27011	190	-1.93249	172	-1.88345	190	-1.90488
	150	-1.01345	230	-1.47577	194	-0.693113	195	-1.22165	192	-1.33316	194	-3.1197	195	-1.99684	195	-2.45299	194	-1.83161	155	-1.94386	157	-2.24266	195	-2.34511	194	-2.77353	154	-2.16941	199	-1.20269
	152	-0.01715	193	-0.607073	195	-0.567502	196	-0.37513	197	-1.66793	199	-1.69613	190	-1.75964	247	-2.98238	189	0.209433	150	0.565636	194	-0.581634	191	-0.507859	195	-0.668454	190	-2.27677	195	0.244987
	202	-1.32813	209	-0.016552	189	-0.953098	191	-2.97757	200	0.377087	190	-0.976157	223	-2.56951	172	-0.639013	201	-1.75299	201	-1.40408	202	-2.15638	200	-2.55784	201	-3.86697	203	-3.26171	201	-1.65467
	235	-0.291003	228	0.068464	198	-0.14917	198	0.769816	178	-0.34864	249	0.45117	229	-1.05222	230	-2.68367	180	-2.36286	180	-0.555661	180	-1.03818	199	0.545496	198	-0.036365	230	-0.772111	180	-0.088144
	215	-0.627899	249	-2.49473	207	-0.751777	193	-0.887064	249	-1.79809	249	-0.926688	249	-1.19545	249	-1.36434	179	-1.24203	190	-0.944181	226	-1.23265	188	-0.718999	188	-1.22036	189	-0.610659	193	-0.812016
	212	-0.415194	160	-2.19052	224	-1.00172	223	-1.324	186	-0.477144	183	-0.513197	181	-2.88608	182	-2.39887	180	-5.06431	224	-1.2816	249	-2.0987	182	-0.5974	223	-0.866241	181	-2.70524	224	-1.54159
	249	-0.725903	249	-3.60029	159	-0.290634	175	-0.564353	249	-2.26934	249	-1.77738	249	-0.912491	249	-2.67204	175	-2.6642	176	-0.707068	206	-1.21196	174	-0.658545	249	-0.555429	249	-2.92592	175	-0.292137
	249	-0.601735	193	-0.137057	193	-0.611221	215	-0.382477	221	-0.330758	150	-0.619915	175	-0.527246	150	-0.602221	208	-0.652295	247	-0.557895	229	-0.77849	248	-1.072	175	-0.55572	176	-0.635926	247	-0.40941
	234	0.086334	212	0.85011	231	0.686839	206	-0.219369	231	-0.533377	207	-0.850278	206	-0.084103	205	0.056491	234	-0.061816	207	-0.149603	236	0.37896	206	-0.74609	205	-0.952574	203	-0.051015	235	-0.299302
diff_P3d
File	Fz		F3		FC1		Cz		C3		CP1		Pz		P3		F4		FC2		C4		CPz		CP2		P4		FCz
	latency	amplitude	latency	amplitude	latency	amplitude	latency	amplitude	latency	amplitude	latency	amplitude	latency	amplitude	latency	amplitude	latency	amplitude	latency	amplitude	latency	amplitude	latency	amplitude	latency	amplitude	latency	amplitude	latency	amplitude
	333	0.160568	375	1.4413	318	0.168726	322	-0.233365	399	1.22112	372	0.408169	385	-0.214057	379	0.668205	399	1.20819	333	0.612535	399	0.877883	332	-0.509669	322	1.19427	399	1.12705	321	0.397661
	300	0.813164	399	0.347895	323	0.941949	300	0.109869	325	1.46745	326	-0.392449	303	-1.54644	339	-0.977556	300	0.480002	300	1.30107	326	-0.15828	300	-1.02641	300	0.628362	399	-1.09339	300	0.601853
	344	2.6677	323	3.6815	322	3.33249	334	3.59939	399	2.03919	399	1.91924	335	1.90993	399	1.92627	337	3.82093	336	3.58697	336	3.48642	334	1.34048	334	1.17585	334	0.958658	334	2.78804
	396	3.39794	337	4.54075	396	3.35236	397	3.19465	338	5.67549	350	5.83767	395	0.666932	326	-0.208205	396	3.10376	399	3.93581	399	4.59681	395	0.336248	396	5.0177	395	0.850283	397	4.6654
	309	0.387042	399	0.223751	317	0.846036	315	0.354392	399	0.47053	320	0.4621	318	0.561097	371	-0.099074	316	0.440499	309	0.087073	308	0.151216	317	0.727283	316	0.862364	321	0.758694	309	0.081076
	349	0.832613	300	1.39262	381	2.52552	363	0.105679	380	1.67199	300	-0.1897	300	-0.950768	300	0.872104	386	1.88777	398	0.709334	337	3.05589	379	-0.493205	358	0.845513	393	-0.424856	362	1.15519
	399	1.16756	360	3.16086	330	2.21234	330	1.9338	323	2.5309	322	2.41126	333	2.14439	363	0.398834	333	0.530951	321	1.59734	335	2.25221	329	2.34085	332	2.44769	390	1.24861	332	1.16131
	369	1.60215	367	0.965233	399	2.24908	399	2.28344	399	2.60583	399	1.55239	359	1.07033	367	0.202206	367	2.93254	399	2.50944	398	2.26885	368	1.66135	399	1.4978	366	0.160576	369	1.86146
	399	0.546987	399	1.46731	393	1.41481	345	1.78805	346	1.83656	351	1.63278	351	2.00296	348	2.98618	346	-1.39655	399	0.386625	348	1.15012	350	2.65661	352	1.75752	399	1.0524	399	0.221706
	392	1.27249	394	3.0095	339	1.55488	326	1.54144	330	1.81327	334	2.7942	332	2.24184	335	2.34274	332	1.01276	335	0.931151	394	0.031635	333	1.71335	394	1.19481	332	0.611327	392	0.808403
	357	0.74881	394	1.25777	395	2.06601	395	1.97227	395	2.09944	396	1.78852	341	1.79212	395	1.44249	321	-0.855815	320	-1.22903	320	-1.20961	395	1.92331	300	0.010363	309	-0.384641	369	0.316196
	338	2.05758	300	2.01159	361	1.30116	359	1.40854	362	2.0814	339	1.1381	341	0.228163	339	-0.698701	343	2.16442	340	1.50417	342	1.05821	342	1.11552	343	1.24969	343	0.517226	339	1.50476
	348	1.45015	399	1.56513	399	3.23898	399	0.648168	398	1.78769	355	2.33043	302	0.052126	349	-0.364622	399	1.46444	399	2.61032	379	0.343422	304	-0.143779	315	0.053606	301	0.626664	399	0.427311
	389	0.573793	370	3.10972	391	4.55823	390	3.52549	374	4.93398	389	3.50384	390	2.25221	374	0.850586	389	2.19847	390	3.26962	391	2.89662	390	1.66616	391	3.40395	390	0.43543	390	2.37968
	316	1.73517	316	2.03488	315	1.95381	316	2.36218	316	1.58253	324	-0.656013	317	1.7686	324	-0.440171	322	1.84875	318	2.33229	321	1.74467	317	1.74558	317	1.9402	337	-0.71645	316	1.99997
	315	-0.117952	307	0.797137	399	1.9649	367	1.23801	314	1.58011	365	0.445528	323	0.660718	314	0.407368	314	1.77319	367	0.85922	379	2.6634	378	-0.062696	322	1.94286	307	1.25362	367	0.646816
	350	0.859145	300	0.84608	304	1.68693	301	1.51573	300	2.66138	302	2.43553	314	1.56883	300	0.386605	351	-0.36963	399	1.09953	399	1.31368	302	1.77681	399	1.64952	300	0.363909	399	1.88837
	399	2.58777	398	6.32757	399	7.33986	397	3.91764	393	6.50081	393	6.60174	393	6.3514	396	3.84406	300	-1.06762	347	0.819593	348	1.38533	393	4.84798	348	2.25995	347	1.20741	398	3.46191
	387	2.16093	379	0.275578	388	1.40326	328	1.29468	359	2.50854	387	2.89516	388	1.45031	387	1.64456	387	1.07722	332	2.5012	386	1.73268	388	3.06392	333	3.00391	387	0.793442	329	1.369
	305	13.6578	385	8.76109	304	10.4003	306	8.40082	309	10.1297	303	5.99459	302	8.86932	303	1.86871	309	6.90355	307	9.47437	307	8.86125	301	6.96275	375	4.39646	399	9.07435	303	12.2947
	309	-0.860188	312	1.7646	309	0.52115	308	-0.610845	310	1.38209	312	0.688579	378	0.650652	358	2.20924	304	-0.413213	306	-1.42654	310	-1.33325	311	0.158567	307	-1.18963	307	-1.74214	308	-0.497771
	399	3.84597	399	4.30946	399	4.32148	399	3.57185	399	3.59536	300	-0.300441	399	-1.72685	300	-1.28164	345	-0.867747	399	2.24275	344	-0.071576	300	-0.928921	300	-2.0289	323	-1.54866	399	4.84038
	300	0.813382	399	0.348191	323	0.942335	300	0.110038	325	1.46797	326	-0.391972	303	-1.54653	339	-0.977662	300	0.480131	300	1.30113	326	-0.15806	300	-1.02649	300	0.628567	399	-1.09361	300	0.602083
	300	-0.071391	392	1.52737	399	3.24474	399	4.10166	300	2.43769	378	2.28568	399	0.955899	307	0.788277	338	1.53389	360	1.40387	330	1.32179	399	0.555664	399	1.6644	399	-0.321889	399	1.82674
	301	0.33443	337	3.06441	399	3.07746	399	1.80675	337	3.08815	335	2.70585	336	2.79299	324	2.94682	390	1.24112	393	1.69179	391	0.592113	393	2.7121	392	1.53356	323	1.66081	399	1.66181
	399	0.633148	324	-0.08195	399	1.04322	388	0.978116	399	0.404866	399	0.872456	390	0.395673	398	-0.238738	391	1.7971	387	0.956596	387	0.86861	389	1.00717	388	0.692843	389	0.170438	387	0.874188
	396	1.21654	350	2.63239	396	3.18201	394	2.30017	350	3.28473	347	1.86291	369	-1.7533	353	1.45769	371	-1.16096	394	3.52822	322	0.860957	323	1.14257	323	1.00406	352	-1.00092	398	2.78547
	339	1.52149	368	1.96412	374	1.48815	349	1.03638	351	4.04528	351	5.03117	351	3.67348	350	3.96417	351	-1.81707	300	-0.271581	348	0.448861	351	5.02207	351	5.06641	354	5.52226	300	-0.451019
	358	0.073753	300	0.374402	354	0.263779	315	0.210311	391	0.735086	393	0.367694	393	0.559837	393	0.539378	353	0.256155	316	0.371414	399	0.678933	315	-0.444856	392	0.722316	399	0.890206	316	0.30721
	300	0.85419	399	3.16087	300	1.61524	300	0.688738	399	3.00696	300	0.271803	302	-0.541208	304	0.541649	300	0.341518	300	0.704446	300	1.45817	300	-0.672216	300	-0.973299	303	-0.740469	300	0.634998
